# Supplementary material
Source: HighWire-hosted journal article supplement (https://www.cmajopen.ca/highwire/filestream/85469/field_highwire_adjunct_files/7/2020-0265-original-submission.pdf)
Supplement: 2020-0265-original-submission.pdf [file 2020-0265-original-submission.pdf]

**TITLE PAGE**

Development and early evaluation of HealthLink Emergency iDoctors in-assistance (HEiDi): An integration of virtual physicians into a provincial 811 health information telephone line

Kendall Ho,<sup>1,2,3</sup> Helen Novak Lauscher,<sup>1,2</sup> Kurtis Stewart,<sup>1</sup> Eric Grafstein,<sup>2</sup> Riyad B. Abu-laban,<sup>2,3</sup> Frank Scheuermeyer,<sup>4,5</sup> Jim Christenson,<sup>2,3</sup> Sandra Sundhu<sup>6</sup>

**Affiliations:**

1. Digital Emergency Medicine, Department of Emergency Medicine, Faculty of Medicine, The University of British Columbia, 818 West 10th Avenue, Vancouver, BC, Canada V5Z 1M9
2. Department of Emergency Medicine, Faculty of Medicine, The University of British Columbia, 2775 Laurel Street, Vancouver, BC, Canada V5Z 1M9
3. BC Emergency Medicine Network, 2775 Laurel Street, Vancouver, BC, Canada V5Z 1M9
4. Department of Emergency Medicine, St Paul's Hospital and The University of British Columbia, 1081 Burrard St, Vancouver, BC, Canada V6Z 1Y6
5. Centre for Health Evaluation and Outcome Sciences, 588 – 1081 Burrard Street, St Paul's Hospital, Vancouver, BC, Canada V6Z 1Y6
6. HealthLink BC, Primary Care Division, Ministry of Health, PO Box 9638, STN PROV GOVT, Victoria, BC, Canada V8W 9P1

Corresponding Author: Dr. Kendall Ho, [kendall.ho@ubc.ca](mailto:kendall.ho@ubc.ca)

Declaration of Competing Interests: The authors have no competing interests to declare.

## ABSTRACT

Background: British Columbia, like many jurisdictions, has a health information telephone service (811) to provide callers information by nurses and help them decide whether to attend an emergency department (ED), primary care clinic, or manage their concern at home. We developed and evaluated a novel service (HEiDi) that partnered virtual physicians (VP) with 811 nurses to support callers.

Methods: All callers categorized as “seek care within 24 hours” by nurses were eligible for referral to HEiDi. VPs connected directly with callers via desktop videoconferencing software, assessed their health complaint, provided advice, and suggested care disposition. We prospectively collected demographics, health concern, VP-determined disposition, caller feedback, and caller outcomes.

Results: From April 6 to August 2, 2020, HEiDi VPs provided 7687 consultations. Most callers (57.8%) were in the 20-64 age range and 62.9% were female. Common health concerns were related to gastroenterology (16.6%), respiratory (11.4%), and dermatology (11.4%). Of the 7531 calls with available data: 2548 (33.8%, 95%CI=32.8%–34.9%) were advised to attempt home treatment, 2885 (38.3%, 95%CI=37.2%–39.4%) to contact a primary care physician within one week, 1331 (15.0%, 95%CI=14.2%–15.8%) to attend an ED immediately, and 538 (7.1%, 95%CI=6.6%–7.8%) to attend their primary provider now. Three hundred seventeen callers responded to the post-call survey, showing a 97.2% satisfaction rate with their experience.

Interpretation: Virtual physicians can provide an effective complement to a provincial health telephone system that results in 72.1% of callers diverted from urgent in-person care assessment and accelerates 15.0% of callers to seek immediate ED care, while providing high satisfaction.

Keywords: Virtual care; Interprofessional collaboration; Healthcare utilization; Telemedicine; Public health

## INTRODUCTION

The novel coronavirus 2019 (COVID-19) pandemic exposed challenges throughout Canada for citizens to access health professionals and health system resources. Unfamiliarity with this disease and its severity prompted many to seek educational information on symptoms to determine whether or not an urgent need existed to access acute care facilities, such as Emergency Departments (ED) or Urgent and Primary Care Centres (UPCC). Visits to EDs during the pandemic decreased,<sup>1</sup> most likely due to fear of disease contraction and concern over appropriateness of ED visits, underscoring a need for patients to have alternative ways to seek care and access health information. In addition, the rules for testing and self-isolation were complex and often changing, thus the public was seeking a consistent source for specific, professional advice.

In 2008, British Columbia (BC) established a province-wide telephone service (811) as an alternative to in-person assessment. Other jurisdictions (e.g., Alberta,<sup>2</sup> United Kingdom's 111 service<sup>3</sup>) also have similar services where registered nurses (RN) provide advice to callers regarding their health concerns. The RNs can advise callers to call 911, go to an ED immediately, seek medical care within 24 hours, schedule an in-person appointment with their usual care provider, or continue with home-based management. In 2016, our team conducted a pilot project and found that incorporating emergency physicians to further assess and advise ED-directed callers led to a 15% decrease in ED visits compared with RN advice alone during the same time period one year previously.<sup>4</sup>

In March 2020, the COVID-19 pandemic led to an immediate seven-fold increase in calls to BC's 811 service, overwhelming personnel and telephone lines. In response and in part based on our pilot project experience, 811 rapidly initiated a novel virtual physician (VP) service – *HealthLink BC Emergency iDoctors in-assistance* (HEiDi) – to assist 811 RNs in providing support to callers and triaging. This paper describes the development and four-month early program evaluation of the HEiDi service.

## METHODS

### *Design*

This is a prospective cohort study of HEiDi, which commenced on April 6, 2020 to manage COVID-19-related calls and expanded to include all calls starting April 22. We used routinely collected, anonymized data from 811. ~~As this evaluation was for quality assurance and improvement purposes, no ethical approval was sought, in keeping with Tri-Council Policy Statement<sup>5</sup> and guidance provided by the University of British Columbia's Research Ethics Board.~~

### *Setting and Sample*

BC is a province with over five million residents across five regional health authorities.<sup>5,6</sup> The 811 telephone service, managed by HealthLink BC (HLBC) in BC Ministry of Health, is available to any BC resident and manages approximately 450,000 calls annually. Callers can discuss their personal health issues, those of a family member, or other individual under their care. Trained RNs determine callers' dispositions using the *healthwise*<sup>®</sup> algorithm (Healthwise, Inc., Boise, USA) and their clinical judgement, triaging callers to one of the following categories: "red" to seek ED care immediately; "yellow" to seek care within 24 hours; "black" to seek primary care within seven days; or "green" to try home treatment.

### *The HEiDi Service*

In mid-March 2020, HLBC established the HEiDi service in partnership with the BC Emergency Medicine Network,<sup>6,7</sup> Rural Coordination Centre of BC,<sup>8</sup> and UBC Department of Emergency Medicine. HEiDi

1  
2  
3 recruited 40 family and emergency physicians to work as VPs. Virtual medical office assistants (VMOA),  
4 situated on-site at 811 offices, received referrals from 811 RNs and transferred callers to connect with  
5 VPs, who were located off-site throughout BC. VPs provided initially 12 hours of services per day from  
6 10:00-22:00, seven days per week, and rapidly increased to 36 hours of daily service per day within four  
7 weeks.  
8

9  
10 As the VP coverage could not accommodate all callers that connected with RNs, HLBC and VP leadership  
11 jointly decided on the following callers' eligibility criteria for referral from 811 RNs to HEiDi: (1) basic  
12 English-language proficiency as there was no consistent translation services available to VPs; (2)  
13 currently residing in BC; and (3) triaged "yellow" by RN, as we felt this group of callers can potentially be  
14 given sufficient advice that may render ED or UPCC visits within 24 hours unnecessary.  
15

16 The HEiDi VPs are either emergency physicians or full-service family physicians licensed in BC, as these  
17 physicians have domain expertise in the assessment of whether callers need to be treated in an ED  
18 versus being managed in the community. With callers' explicit consent, VMOAs securely sent callers'  
19 synopses of the chief complaints and related health information captured by 811 RNs to VPs via an  
20 electronic medical record system (MOIS, Bright Health, Prince George, BC). VPs initiated the consults  
21 with callers via Zoom phone calls (Zoom Video Communications, Inc., San Jose, USA); if the clinical  
22 situation was deemed by either the callers or the VP to warrant visual assessments, and with mutual  
23 agreement, a Zoom video call was initiated. VPs directly provided health advice to callers and retained  
24 or modified RN disposition decisions based on the same classification as above. To ensure safety, VPs  
25 could trigger follow-up calls by another VP the next day or later to check callers' health status, ensure  
26 improvement, or exclude deterioration. In addition, for quality assurance purposes, all new VPs during  
27 their first 3 clinical shifts had all callers contacted by the follow-up VP the next-day.  
28  
29  
30  
31

### 32 **Data Sources**

33 Four different data sources were utilized: (1) 811's telephony system, which recorded the volume of  
34 calls received each day by service level; (2) 811's caller encounter electronic health record, a database  
35 with detailed record of each caller, including demographics, health problem category, nurse triage  
36 decision, and, specific to HEiDi, the VP triage decision and clinical notes; (3) from mid-May onwards,  
37 MOIS data extracts which contained information related to VP consultation characteristics (e.g.,  
38 duration); and (4) as of June 8, 2020, an anonymous online caller survey, offered to all HEiDi callers via a  
39 URL (<https://survey.health.gov.bc.ca/hlbcVPS#>). This 18-item survey included questions ~~asked~~  
40 callers to rate aspects of the service, their experience, and planned actions on a five-point Likert-type  
41 scale, along with several demographic ~~questions,~~ and open-ended questions. ~~to provide feedback.~~ The  
42 survey was co-developed by members of the 811 service leadership and staff (including members of  
43 clinical, operational, communications, and analytics teams, plus the university clinical and evaluation  
44 leads). The survey was intended to provide an accessible and practical means of capturing patient  
45 feedback for quality improvement purposes. Items were developed based on service goals and others  
46 adapted from previously published surveys related to patient perspectives on virtual health  
47 encounters.<sup>9,10</sup>  
48  
49  
50  
51

### 52 **Outcomes**

53 This process evaluation focused on both program and caller outcomes relevant to HEiDi, including: call  
54 volumes, particularly the busiest days, characteristics of callers accessing HEiDi (e.g., age group, gender,  
55 health concern, if concern is COVID-19 related, health authority), characteristics of the virtual  
56  
57  
58  
59  
60

consultations (e.g., duration), the proportion of callers diverted from seeking care within 24 hours (as defined by the percentage of callers triaged “yellow” by VPs compared to 811 RNs), caller-reported experience and satisfaction with HEiDi. We additionally standardized calls by each geographic health authority’s population to compare the number of calls per 100,000 residents.<sup>1110</sup>

### **Analysis**

R (version 4.0.2, R Core Team, Vienna, Austria) was used for the analysis, with results descriptively expressed as means (standard deviations, SD) if normally distributed, or medians (interquartile ranges, IQR) if non-normally distributed. X<sup>2</sup>-tests were used to compare distributions between categorical variables and t-tests to compare normally distributed variables (no comparisons of non-normally distributed variables were done).

### **Ethics Statement**

[As this evaluation was for quality assurance and improvement purposes and used routinely collected anonymized data, no ethical approval was sought, in keeping with the Tri-Council Policy Statement<sup>125</sup> and guidance provided by the University of British Columbia’s Research Ethics Board.](#)

## **RESULTS**

### **Call Volumes**

During the 17-week study period, 811 RNs triaged 21,441 callers as “yellow,” of whom 7,845 (36.6%) were referred to HEiDi and 7,687 (98.0%) of those received a virtual consultation. Figure 1 shows the flow of callers through 811 and HEiDi. Figure 2 shows the daily and cumulative call volumes of HEiDi for the reporting period. The single day peak was 106 calls on July 12, while HEiDi managed a mean of 74.84 (SD=12.62) calls per day since the service expanded to 36 hours of coverage. On average, Saturday and Sunday were the busiest days of the week, while Monday and Tuesday were the slowest (see Supplementary Material); weekends (mean=73.32 calls per day [SD=21.91]) were busier than weekdays (mean=62.42 calls per day [SD=20.21];  $p=0.015$ ).

### **Caller Characteristics**

Table 1 summarizes demographic characteristics of callers. Callers were more likely to be female and 57.8% were adults in the 20-64 years old age range. Health concerns encompassed a range of 23 standard problem categories used by 811 RNs (see Supplementary Material), with approximately half being one of four categories and 39.3% being COVID-19-related. The distribution of age groups significantly differed by gender ( $p<0.001$ ), with female callers more likely to be in the 20-39 year old age group (38.2% v. 26.2%) and males were more likely to be in the 0-4 year old age groups (23.4% v. 12.5%) (see Supplementary Material).

While 35.9% of absolute calls came from one regional health authority (Fraser), calls standardized by population revealed that the number of calls per 100,000 residents was: 180.37 for Vancouver Island; 152.99 for Northern; 141.66 for Interior; 140.96 for Fraser; and 138.03 for Vancouver Coastal (Figure 3). The distribution of age groups significantly differed by health authority ( $p<0.001$ ), but gender was similar across health authorities ( $p=0.42$ ) (see Supplementary Material).

Based on 5659 consultations with available data in MOIS since its mid-May implementation, 5538 unique callers accessed HEiDi, with 112 callers having multiple consultations (excluding follow-ups) within the reporting period. Of those, 107 (95.5%) had two consultations and five (4.5%) had three or more.

### **VP Consultation Characteristics**

After speaking with the 811 RN, most callers (88.9%) waited one minute or less before their call was answered by the HEiDi VMOA (median=0.05 minutes [IQR=0.03–0.32]). After speaking with the VMOA, callers waited a median time of 28 minutes (IQR=19–44) before the VP contacted them to begin the consultation. Consultations with VPs lasted a median time of 18 minutes (IQR=13–24). Based on 5659 consultations with available MOIS data, 996 (17.6%) consultations used Zoom video. VPs completed a mean of 12.29 (SD=3.79) consultations per six-hour shift.

### **VP Triage Decision**

Of the 7687 callers assessed by a VP, 7531 (98.0%) had available data for the VP's triage decision. Of those, 2548 (33.8%, 95%CI=32.8%–34.9%) were advised to attempt home treatment and 2885 (38.3%, 95%CI=37.2%–39.4%) were advised to contact a primary care physician within one week, resulting in a “downgrade” of triage level for 72.1% (95%CI=71.1%–73.1%) of callers (Figure 1). A further 1331 (15.0%, 95%CI=14.2%–15.8%) were advised to attend an ED or UPCC immediately and 538 (7.1%, 95%CI=6.6%–7.8%) were advised to attend their primary care provider now. The distribution of VP triage decisions significantly differed by health authority ( $p=0.004$ ), with Northern having the lowest “green” triage proportion and Interior having the highest “red” triage proportion (see Supplementary Material).

### **Caller-Reported Experience**

Responses were received from 331 callers (an 18.2% response rate of 1819 survey links sent), of which 317 (95.8%) were at least partially completed. [Callers who responded to the survey](#) almost uniformly rated their experience with the HEiDi service very favorably (97.2% satisfied with overall experience), 80.8% reported that they felt better after speaking with the VP, and 97.6% stated that they planned to follow the physician's advice (Figure 4, [and see Supplementary Material Table 2](#)).

## **INTERPRETATION**

Telephone-based 811 services offered by public health systems that respond to citizens' urgent health inquiries exist in BC, many provinces in Canada, and globally.<sup>2,3</sup> While callers accessing these services use phones and are connected with nurses, HEiDi is the first such service (that we are aware of) to integrate virtual physicians in partnership with nurses to provide advice to callers, using video in appropriate cases. Two studies from other jurisdictions during the COVID-19 pandemic reported that telemedicine options that replace in-person appointments were rated favourably by callers.<sup>13,14,11,12</sup>

Our early process evaluation results indicate that, [by](#) partnering VPs with 811 RNs, a substantial percentage of callers can be diverted from urgent referrals to in-person EDs or UPCC visits, compared to RN-triage alone. During the peak of the COVID-19 pandemic, this undoubtedly helped preserve ED and UPCC capacity to treat those who need acute care services, decreased congestion and overcrowding of EDs or walk-in-clinics, and improved appropriate use of acute care services. Moreover, a virtual approach protected individuals from unnecessary potential exposure to COVID-19 and other infections in ED or UPCC waiting rooms.

Appropriate triaging of 811 callers also led to an acceleration of those callers who required acute care to present to ED immediately, while simultaneously reassuring those that could be managed at home or by their community-based healthcare services. In this respect, the HEiDi service was designed to preserve the primary care system to serve callers' needs longitudinally by health professionals familiar to them.



This is the only report that we are aware of that describes the experience by physicians to define who can be served virtually and who needs a face-to-face visit for assessment and/or treatment.

~~While the response rate to survey was relatively low,~~ callers felt that HEiDi VPs provided timely and trustworthy information ~~and assurance.~~ ~~This allowed a majority of~~ A majority of HEiDi callers ~~to were~~ able to manage at home or without needing to go to the ED. ~~Those callers who did respond to the survey reported resulting in~~ high satisfaction and reassurance for both callers and their families. Callers ~~They~~ reported reduction in anxiety in dealing with their conditions or problems for which they called 811. Further, this on-demand phone and videoconferencing service was easily accessible and convenient for all BC residents, available seven days per week anywhere in the province, including remote communities.

From the health system's perspective, this preliminary process evaluation suggested that HEiDi is a consistent, reliable, and provincially accessible approach for timely access of health advice to all callers. The VP workforce can contract or expand based on caller volumes, providing staffing flexibility for pandemic-related volume increases and decreases. HEiDi supported the appropriate triaging of callers through interprofessional collaboration with 811 RNs and VMOAs, such that only calls requiring physician intervention were answered by HEiDi. Conceivably, this could result in cost-effectiveness by deploying physicians only when deemed necessary.

### **Limitations**

This is a preliminary report of a novel physician-assisted nurse-managed telephone service in a single province during a pandemic, ~~thus and~~ results may differ in other settings or times. ~~Patients-Callers~~ outside of BC, or those who did not speak English, were not served by this program and results may be different. We have not yet collected long-term or linked ~~administrative data,~~ and therefore ~~patients callers~~ may have attended the ED, been hospitalized, or died as a result of their condition, irrespective of physician advice, without our knowledge. Many primary care physicians were unavailable, or only available by telephone, and this increased our ED and UPCC referral rates, compared to time periods when more comprehensive primary care was available. ~~Patient-The caller~~ survey ~~findings and low~~ ~~low~~ ~~response rate~~ likely reflect both selection and social desirability biases and these may spuriously increase favorable results. At this stage, we cannot estimate the direct and indirect costs and benefits of the program beyond the outlined results.

### **Conclusion**

Our early program evaluation of HEiDi during its first 17 weeks of service demonstrates that VPs can add significant and flexible capacity to an 811 service. It results in a substantial proportion of callers diverted from seeking immediate in-person medical attention, has accelerated urgent care when appropriate, and has been well received by ~~callers~~. Our innovative use of information technology enabling virtual physician consultations supports citizens' equitable access to needed healthcare advice and information and merits consideration in other similar public telephone access systems, during and beyond pandemics. In future research, we intend to link our 811 data with ED and practitioner data to assess patient safety, system utilization, and cost-effectiveness.

1  
2  
3 **DATA SHARING STATEMENT**

4 Data reported here are available from the corresponding author upon reasonable request with requisite  
5 permissions.  
6

7  
8 **CONTRIBUTOR'S STATEMENT**

9 All authors meet the four ICMJE's criteria for authorship, namely all authors: (1) contributed  
10 substantially to conception and design, or acquisition of data, or analysis and interpretation of data, (2)  
11 drafted the article or revised it critically for important intellectual content, (3) gave final approval of the  
12 version to be published, and (4) agreed to act as guarantor of the work (ensuring that questions related  
13 to any part of the work are appropriately investigated and resolved).  
14  
15

16 **FUNDING STATEMENT**

17 The HEiDi service is funded by the British Columbia Ministry of Health through HealthLink BC. This  
18 evaluation was funded by British Columbia's Joint Standing Committee on Rural Issues. The funder had  
19 no role in the design of this evaluation, data collection, analysis, interpretation, drafting the manuscript,  
20 or decision to submit for publication.  
21  
22  
23  
24  
25  
26  
27  
28  
29  
30  
31  
32  
33  
34  
35  
36  
37  
38  
39  
40  
41  
42  
43  
44  
45  
46  
47  
48  
49  
50  
51  
52  
53  
54  
55  
56  
57  
58  
59  
60

Confidential



## REFERENCES

1. CIHI. Canadian emergency department visits drop 25% in early weeks of COVID-19 pandemic [Internet]. 2020 [cited 2020 Sep 1]. Available from: <https://www.cihi.ca/en/canadian-emergency-department-visits-drop-25-in-early-weeks-of-covid-19-pandemic>
2. Alberta Health Services. Health Link 811 [Internet]. 2020 [cited 2020 Sep 1]. Available from: <https://www.albertahealthservices.ca/findhealth/service.aspx?Id=1001957&facilityId=1011654>
3. NHS. NHS 111 [Internet]. 2020 [cited 2020 Sep 1]. Available from: <https://www.nhs.uk/using-the-nhs/nhs-services/urgent-and-emergency-care/nhs-111/>
4. Grafstein E, Abu-Laban RB, Wong B, Stenstrom R, Scheuermeyer FX, Root M, et al. Safety and efficiency of emergency physician supplementation in a provincially nurse-staffed telephone service for urgent caller advice. *CJEM* [Internet]. 2017 May 15;19(S1):S32–3. Available from: [https://www.cambridge.org/core/product/identifier/S1481803517000781/type/journal\\_article](https://www.cambridge.org/core/product/identifier/S1481803517000781/type/journal_article)
5. Panel on Research Ethics. Tri-Council Policy Statement: Ethical Conduct for Research Involving Humans – TCPS 2 (2018) [Internet]. 2020 [cited 2020 Sep 1]. Available from: [https://ethics.gc.ca/eng/policy-politique\\_tcps2-eptc2\\_2018.html](https://ethics.gc.ca/eng/policy-politique_tcps2-eptc2_2018.html)
6. BC Stats. Quarterly Population Highlights [Internet]. 2020. Available from: [https://www2.gov.bc.ca/assets/gov/data/statistics/people-population-community/population/population\\_highlights\\_2020q1.pdf](https://www2.gov.bc.ca/assets/gov/data/statistics/people-population-community/population/population_highlights_2020q1.pdf)
7. Abu-Laban RB, Drebit S, Lindstrom RR, Archibald C, Eggers K, Ho K, et al. The British Columbia Emergency Medicine Network: A Paradigm Shift in a Provincial System of Emergency Care. *Cureus* [Internet]. 2018 Jan 4; Available from: <https://www.cureus.com/articles/9922-the-british-columbia-emergency-medicine-network-a-paradigm-shift-in-a-provincial-system-of-emergency-care>
8. Marsden J, Drebit S, Lindstrom R, MacKinnon C, Archibald C, Abu-laban. The BC Emergency Medicine Network: Evaluation Approach And Early Findings. *BCMJ*. 2019;61(4):164–71.
9. RCCbc. Rural Coordination Centre of BC [Internet]. 2020 [cited 2020 Sep 1]. Available from: <https://rccbc.ca/>
10. BC Stats. British Columbia - Population Estimates [Internet]. 2020 [cited 2020 Sep 1]. Available from: <https://bcstats.shinyapps.io/popApp/>
11. Fieux M, Duret S, Bawazeer N, Denoix L, Zaouche S, Tringali S. Telemedicine for ENT: Effect on quality of care during Covid-19 pandemic. *Eur Ann Otorhinolaryngol Head Neck Dis* [Internet]. 2020 Sep;137(4):257–61. Available from: <https://linkinghub.elsevier.com/retrieve/pii/S1879729620301538>
12. Dobrusin A, Hawa F, Gladshiteyn M, Corsello P, Harlen K, Walsh CX, et al. Gastroenterologists and Patients Report High Satisfaction Rates With Telehealth Services During the Novel Coronavirus 2019 Pandemic. *Clin Gastroenterol Hepatol* [Internet]. 2020 Jul; Available from: <https://linkinghub.elsevier.com/retrieve/pii/S1542356520309769>

FIGURES

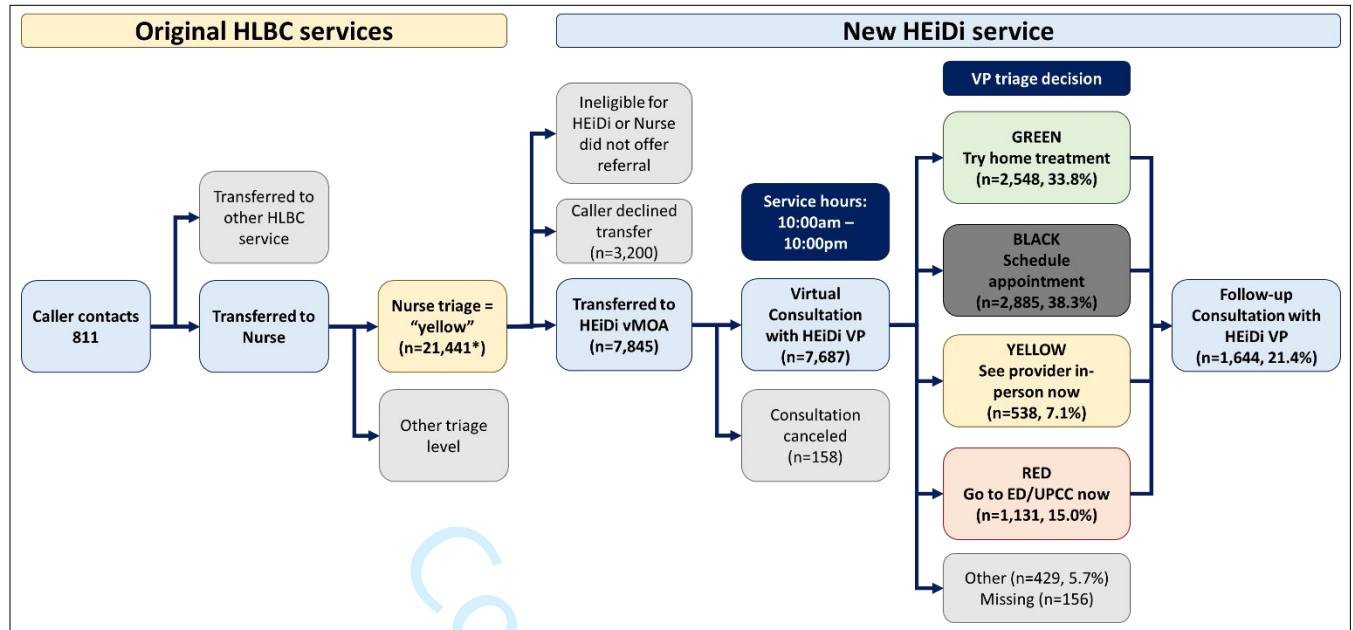

Figure 1. Flow of callers through 811 and HEiDi service. \*Nurse call numbers reported here are only for the 12-hour period of the HEiDi service.

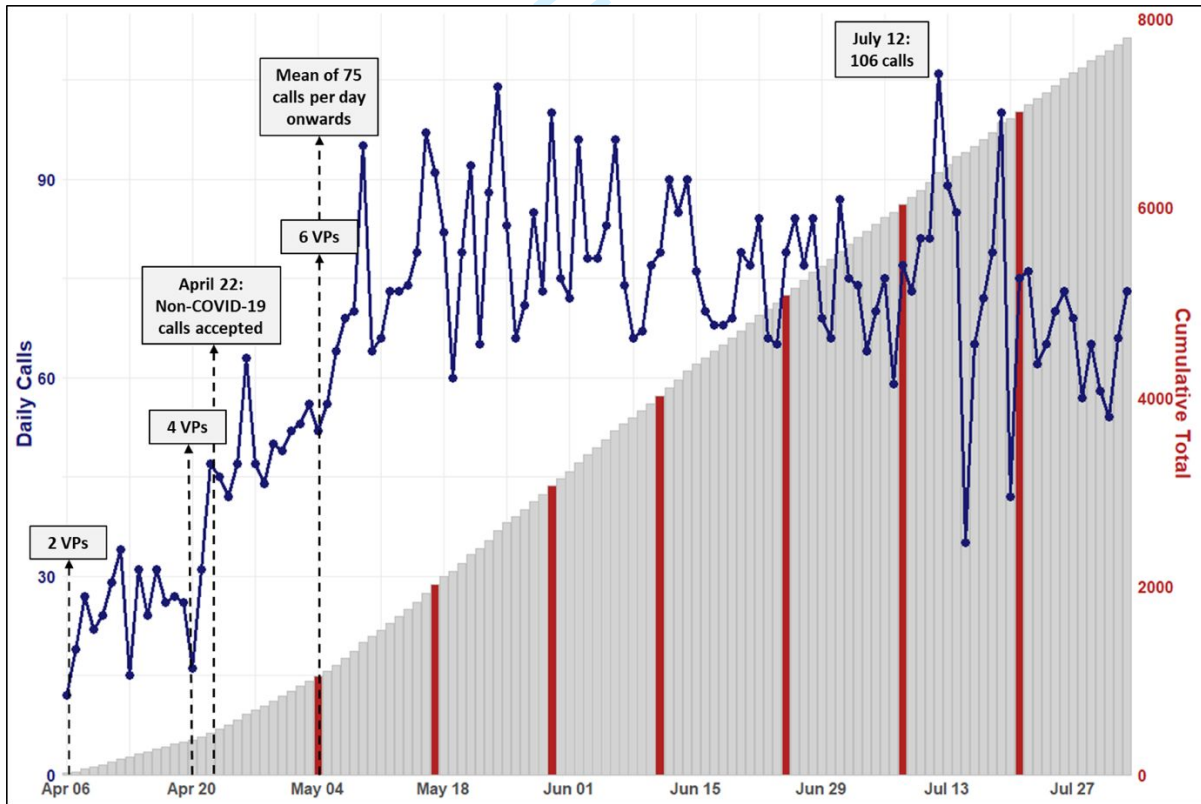

Figure 2. Daily and cumulative call volumes to HEiDi. Red bars indicate when 1,000, 2,000, etc. calls were received.

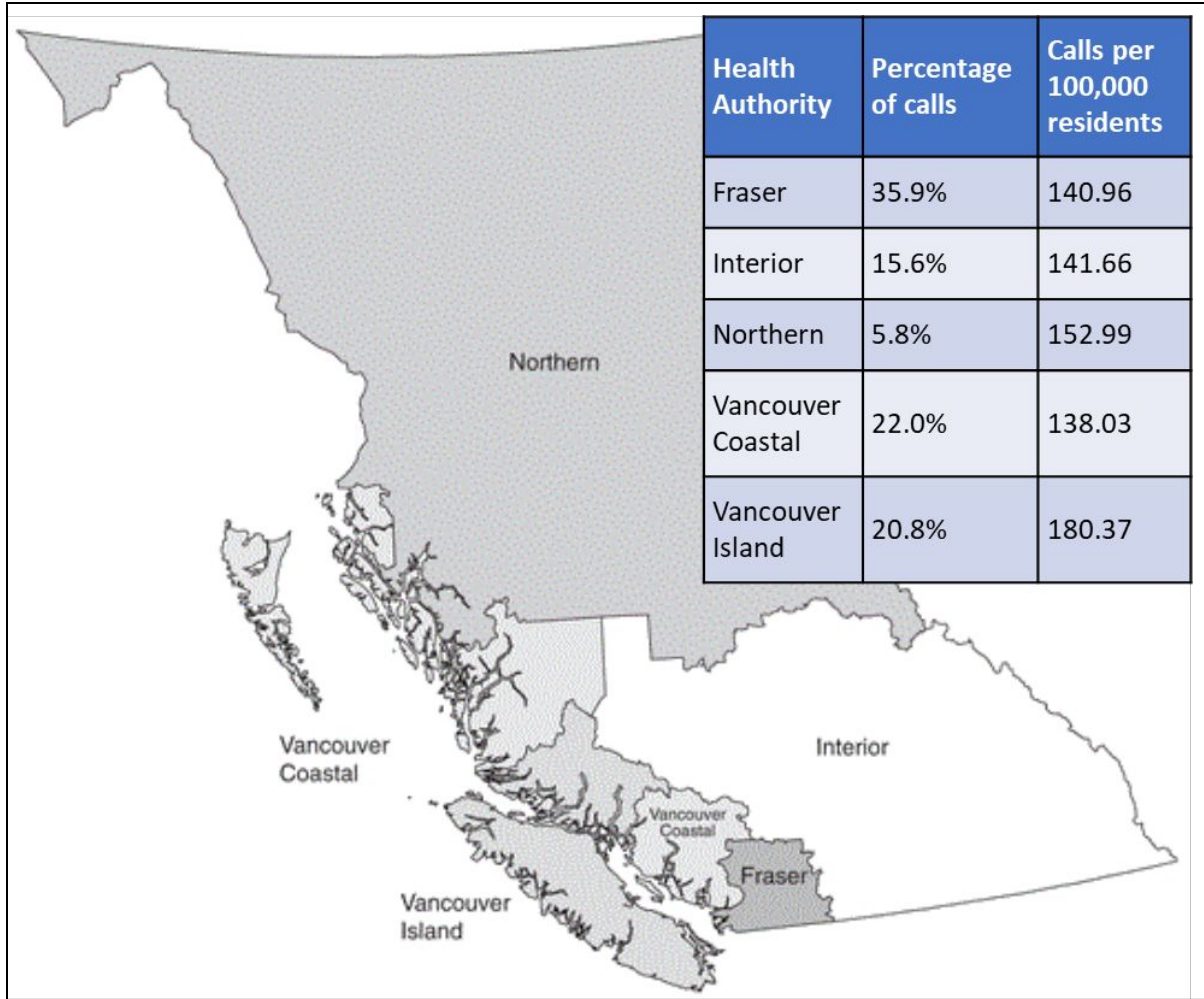

**Figure 3. Summary of percentage of calls and population-standardized number of calls by BC Health Authority.**

1  
2  
3  
4  
5  
6  
7  
8  
9  
10  
11  
12  
13  
14  
15  
16  
17  
18  
19  
20  
21  
22  
23  
24  
25  
26  
27  
28  
29  
30  
31  
32  
33  
34  
35  
36  
37  
38  
39  
40  
41  
42  
43  
44  
45  
46  
47  
48  
49  
50  
51  
52  
53  
54  
55  
56  
57  
58  
59  
60

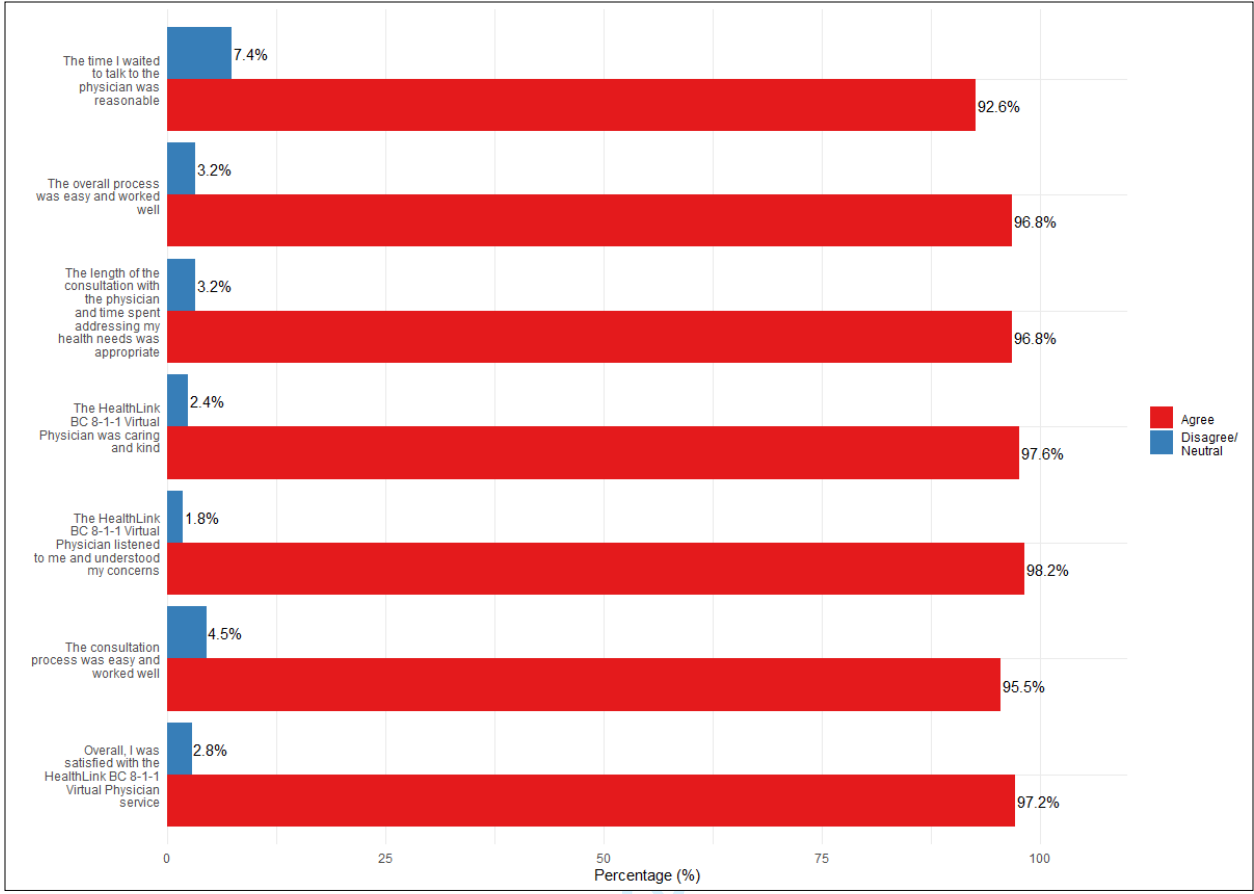

**Figure 4. Caller-reported satisfaction ratings from the post-call online survey (n=317).** Ratings were dichotomized into “Agree” (caller rating = 4 or 5) and “Disagree/Neutral” (caller rating = 1, 2, or 3). The items presented here correspond to the first seven items in Table 2.

## TABLES

| <b>Table 1. Caller characteristics of HEiDi referrals (n=7687).</b>                                                                                                                                                                                                                                                                                                                                                                                                                          |                           |
|----------------------------------------------------------------------------------------------------------------------------------------------------------------------------------------------------------------------------------------------------------------------------------------------------------------------------------------------------------------------------------------------------------------------------------------------------------------------------------------------|---------------------------|
| <b>Gender (female)</b>                                                                                                                                                                                                                                                                                                                                                                                                                                                                       | 4814 (62.9%)              |
| <i>Missing or Unknown</i>                                                                                                                                                                                                                                                                                                                                                                                                                                                                    | 37                        |
| <b>Age group</b>                                                                                                                                                                                                                                                                                                                                                                                                                                                                             |                           |
| < 1 year                                                                                                                                                                                                                                                                                                                                                                                                                                                                                     | 544 (7.0%)                |
| 1 – 4 years                                                                                                                                                                                                                                                                                                                                                                                                                                                                                  | 721 (9.4%)                |
| 5 – 19 years                                                                                                                                                                                                                                                                                                                                                                                                                                                                                 | 887 (11.6%)               |
| 20 – 39 years                                                                                                                                                                                                                                                                                                                                                                                                                                                                                | 2603 (33.9%)              |
| 40 – 64 years                                                                                                                                                                                                                                                                                                                                                                                                                                                                                | 1836 (23.9%)              |
| > 64 years                                                                                                                                                                                                                                                                                                                                                                                                                                                                                   | 1090 (14.2%)              |
| <i>Missing or Unknown</i>                                                                                                                                                                                                                                                                                                                                                                                                                                                                    | 2                         |
| <b>Health Authority</b>                                                                                                                                                                                                                                                                                                                                                                                                                                                                      |                           |
| <i>Fraser</i>                                                                                                                                                                                                                                                                                                                                                                                                                                                                                | 2688 (35.9%)              |
| <i>Interior</i>                                                                                                                                                                                                                                                                                                                                                                                                                                                                              | 1172 (15.6%)              |
| <i>Northern</i>                                                                                                                                                                                                                                                                                                                                                                                                                                                                              | 435 (5.8%)                |
| <i>Vancouver Coastal</i>                                                                                                                                                                                                                                                                                                                                                                                                                                                                     | 1648 (22.0%)              |
| <i>Vancouver Island</i>                                                                                                                                                                                                                                                                                                                                                                                                                                                                      | 1549 (20.7%)              |
| <i>Missing or Unknown</i>                                                                                                                                                                                                                                                                                                                                                                                                                                                                    | 195                       |
| <b>Health concern category</b>                                                                                                                                                                                                                                                                                                                                                                                                                                                               |                           |
| <i>Gastroenterology (digestive)</i>                                                                                                                                                                                                                                                                                                                                                                                                                                                          | 1275 (16.6%)              |
| <i>Respiratory</i>                                                                                                                                                                                                                                                                                                                                                                                                                                                                           | 877 (11.4%)               |
| <i>Dermatology (skin, hair, nails)</i>                                                                                                                                                                                                                                                                                                                                                                                                                                                       | 874 (11.4%)               |
| <i>Musculoskeletal (bone, muscle, joint)</i>                                                                                                                                                                                                                                                                                                                                                                                                                                                 | 813 (10.5%)               |
| <b>Caller's health concern related to COVID-19</b>                                                                                                                                                                                                                                                                                                                                                                                                                                           | 1169 (39.3%) <sup>1</sup> |
| <i>Missing or Unknown</i>                                                                                                                                                                                                                                                                                                                                                                                                                                                                    | 4749                      |
| <b>Caller has a usual care provider</b>                                                                                                                                                                                                                                                                                                                                                                                                                                                      | 1228 (81.3%) <sup>2</sup> |
| <i>Missing</i>                                                                                                                                                                                                                                                                                                                                                                                                                                                                               | 133                       |
| <i>No follow-up</i>                                                                                                                                                                                                                                                                                                                                                                                                                                                                          | 6043                      |
| <p><i>Note: cell values represent counts (percentages). Percentages were calculated after removing missing/unknown/not applicable data from the denominator.</i></p> <p><sup>1</sup><i>Only a subset of 2977 HEiDi calls were recorded if they were COVID-19-related or not.</i></p> <p><sup>2</sup><i>Only callers receiving a subsequent follow-up call from a VP are asked if they have a usual care provider; 1511 callers received a follow-up call and answered this question.</i></p> |                           |

**SUPPLEMENTARY MATERIAL*****Call volumes by day of week***

| <b>Summary of HEiDi call volumes by day.</b> |                                                    |
|----------------------------------------------|----------------------------------------------------|
| <b>Day of week</b>                           | <b>Mean (SD) number of daily calls (n=17 each)</b> |
| Mon                                          | 59.71 (25.14)                                      |
| Tue                                          | 60.06 (19.71)                                      |
| Wed                                          | 62.53 (19.1)                                       |
| Thu                                          | 64.94 (18.84)                                      |
| Fri                                          | 64.88 (19.39)                                      |
| Sat                                          | 72.53 (22.5)                                       |
| Sun                                          | 74.12 (21.97)                                      |

***811 health problem categories***

Total n=7687; 23 problem categories used.

| <b>Nursing problem category</b>          | <b>n</b> | <b>%</b> |
|------------------------------------------|----------|----------|
| Gastroenterology (Digestive)             | 1275     | 16.6     |
| Respiratory                              | 877      | 11.4     |
| Dermatology (Skin, Hair, Nails)          | 874      | 11.4     |
| Musculoskeletal (Bone, Muscle, Joint)    | 811      | 10.6     |
| Otolaryngology (Ear, Nose, Throat)       | 602      | 7.8      |
| Neurology                                | 597      | 7.8      |
| First Aid                                | 414      | 5.4      |
| Gynecology (Women's Reproductive)        | 407      | 5.3      |
| Urology (Urinary Tract & Male Genitalia) | 335      | 4.4      |
| Ophthalmology (Eyes)                     | 308      | 4.0      |
| Pediatrics                               | 275      | 3.6      |
| Obstetrics & Postpartum                  | 230      | 3.0      |
| Immunology                               | 181      | 2.4      |
| Cardiovascular (Heart/Circulation)       | 171      | 2.2      |
| Dental/Mouth                             | 123      | 1.6      |
| Psychology (Mental Health)               | 73       | 0.9      |
| Diabetes                                 | 42       | 0.5      |

|                                  |    |     |
|----------------------------------|----|-----|
| Wellness                         | 23 | 0.3 |
| Pharmaceutical (Medication)      | 22 | 0.3 |
| Endocrinology (Glands)           | 21 | 0.3 |
| Infectious/Communicable Diseases | 19 | 0.2 |
| Oncology (Site-Specific Cancers) | 5  | 0.1 |
| Hematology (Blood)               | 2  | 0.0 |

### **Distributions of age group, gender, and health authority**

Total n=7687.

| Age Group               | Female (n=4814) | Male (n=2836) | Gender missing (n=37) |
|-------------------------|-----------------|---------------|-----------------------|
| < 1 year                | 269 (5.6%)      | 277 (9.8%)    | 2                     |
| 1 – 4 years             | 331 (6.9%)      | 386 (13.6%)   | 4                     |
| 5 – 19 years            | 526 (10.9%)     | 354 (12.5%)   | 7                     |
| 20 – 39 years           | 1841 (38.2%)    | 743 (26.2%)   | 19                    |
| 40 – 64 years           | 1168 (24.3%)    | 666 (23.5%)   | 2                     |
| > 64 years              | 679 (14.1%)     | 410 (14.5%)   | 1                     |
| Age group missing (n=2) | 0               | 0             | 2                     |

| Health Authority                 | Female (n=4701) | Male (n=2777) | Gender missing (n=37) |
|----------------------------------|-----------------|---------------|-----------------------|
| Fraser                           | 1673 (35.6%)    | 1010 (36.4%)  | 5                     |
| Interior                         | 717 (15.3%)     | 455 (16.4%)   | 0                     |
| Northern                         | 281 (6%)        | 152 (5.5%)    | 2                     |
| Vancouver Coastal                | 1036 (22%)      | 609 (21.9%)   | 3                     |
| Vancouver Island                 | 994 (21.1%)     | 551 (19.8%)   | 4                     |
| Health authority missing (n=195) | 113             | 59            | 23                    |

| Age Group               | Fraser (n=2688) | Interior (n=1172) | Northern (n=435) | Vancouver Coastal (n=1648) | Vancouver Island (n=1549) | Health authority missing (n=195) |
|-------------------------|-----------------|-------------------|------------------|----------------------------|---------------------------|----------------------------------|
| < 1 year                | 247 (9.2%)      | 81 (6.9%)         | 26 (6%)          | 126 (7.6%)                 | 58 (3.7%)                 | 10                               |
| 1 – 4 years             | 296 (11%)       | 99 (8.4%)         | 47 (10.8%)       | 156 (9.5%)                 | 104 (6.7%)                | 19                               |
| 5 – 19 years            | 332 (12.4%)     | 130 (11.1%)       | 66 (15.2%)       | 170 (10.3%)                | 171 (11%)                 | 17                               |
| 20 – 39 years           | 849 (31.6%)     | 388 (33.1%)       | 159 (36.6%)      | 620 (37.6%)                | 508 (32.8%)               | 79                               |
| 40 – 64 years           | 607 (22.6%)     | 263 (22.4%)       | 115 (26.4%)      | 377 (22.9%)                | 422 (27.2%)               | 52                               |
| > 64 years              | 357 (13.3%)     | 211 (18%)         | 22 (5.1%)        | 199 (12.1%)                | 286 (18.5%)               | 15                               |
| Age group missing (n=3) | 0               | 0                 | 0                | 0                          | 0                         | 3                                |



### Distribution of VP triage decision by health authority

Note: These numbers exclude the category of “other” for VP triage decision. The distribution of VP triage decisions significantly differed by health authority ( $\chi^2(12)=28.95, p=0.004$ ).

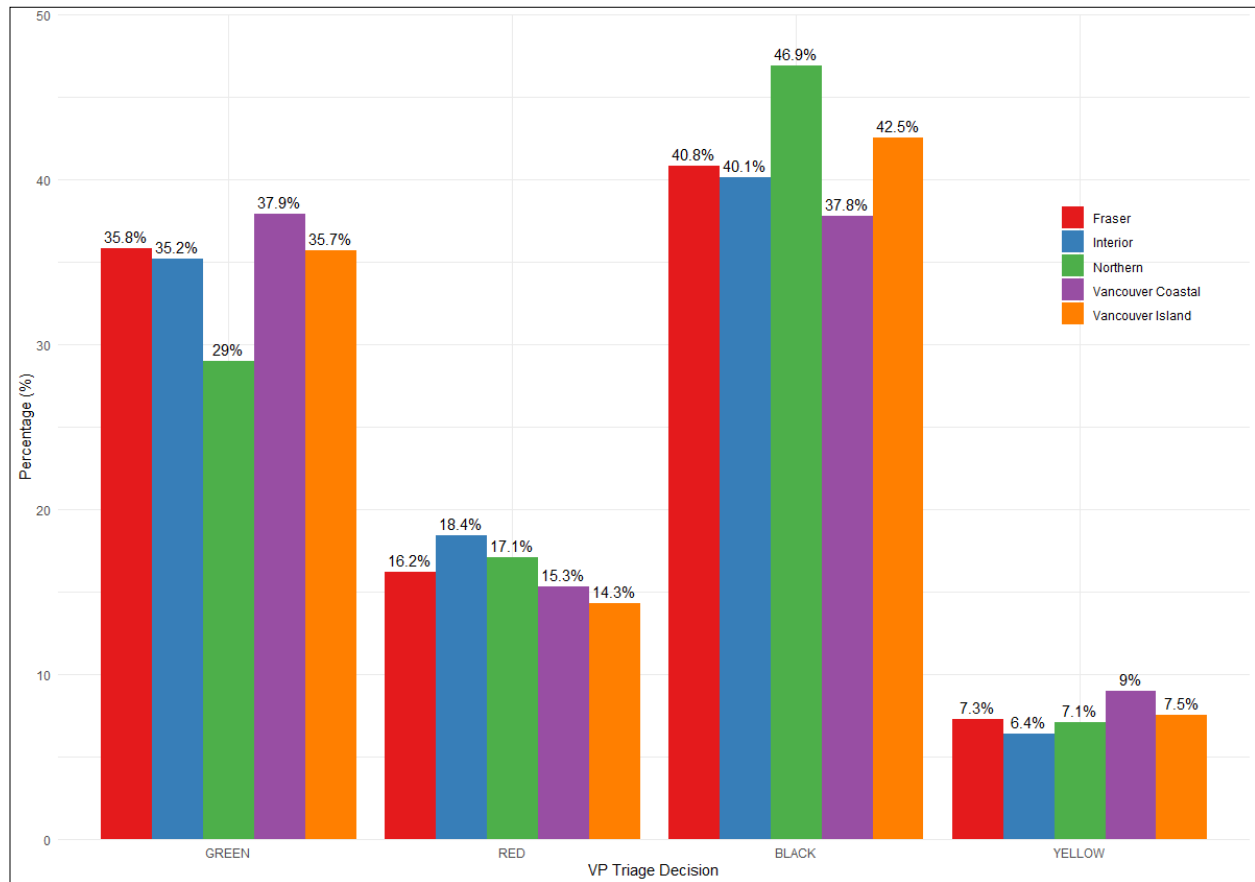

| Health Authority         | VP Triage Decision |             |              |            |
|--------------------------|--------------------|-------------|--------------|------------|
|                          | Green              | Red         | Black        | Yellow     |
| <b>Fraser</b>            | 893 (35.8%)        | 403 (16.2%) | 1016 (40.8%) | 181 (7.3%) |
| <b>Interior</b>          | 385 (35.2%)        | 201 (18.4%) | 439 (40.1%)  | 70 (6.4%)  |
| <b>Northern</b>          | 115 (29%)          | 68 (17.1%)  | 186 (46.9%)  | 28 (7.1%)  |
| <b>Vancouver Coastal</b> | 578 (37.9%)        | 233 (15.3%) | 576 (37.8%)  | 137 (9%)   |
| <b>Vancouver Island</b>  | 506 (35.7%)        | 203 (14.3%) | 602 (42.5%)  | 107 (7.5%) |

*Green: caller advised to try treatment at home.*

*Red: caller advised to go to ED immediately.*

*Black: caller advised to schedule an in-person appointment with their primary care provider within the next 7 days.*

*Yellow: caller advised to see primary care provider within 24 hours.*

1  
2  
3  
4  
5  
6  
7  
8  
9  
10  
11  
12  
13  
14  
15  
16  
17  
18  
19  
20  
21  
22  
23  
24  
25  
26  
27  
28  
29  
30  
31  
32  
33  
34  
35  
36  
37  
38  
39  
40  
41  
42  
43  
44  
45  
46  
47  
48  
49  
50  
51  
52  
53  
54  
55  
56  
57  
58  
59  
60

**Summary of caller responses to online survey**

| Summary of caller responses to online post-consultation survey (n=317).                                                                              |                       |          |            |            |                    |         |
|------------------------------------------------------------------------------------------------------------------------------------------------------|-----------------------|----------|------------|------------|--------------------|---------|
| Question                                                                                                                                             | Response options      |          |            |            |                    | Missing |
|                                                                                                                                                      | 1 = Strongly disagree | 2        | 3          | 4          | 5 = Strongly agree |         |
| The consultation process was easy and worked well.                                                                                                   | 6 (2.1%)              | 0        | 7 (2.4%)   | 42 (14.6%) | 232 (80.8%)        | 30      |
| The HealthLink BC 8-1-1 Virtual Physician was caring and kind.                                                                                       | 4 (1.4%)              | 1 (0.3%) | 2 (0.7%)   | 17 (5.9%)  | 262 (91.6%)        | 31      |
| The HealthLink BC 8-1-1 Virtual Physician listened to me and understood my concerns.                                                                 | 4 (1.4%)              | 0        | 1 (0.4%)   | 21 (7.4%)  | 259 (90.9%)        | 32      |
| The time I waited to talk to the physician was reasonable.                                                                                           | 2 (0.7%)              | 5 (1.8%) | 14 (5%)    | 46 (16.3%) | 215 (76.2%)        | 35      |
| The length of the consultation with the physician and time spent addressing my health needs was appropriate.                                         | 3 (1.1%)              | 2 (0.7%) | 4 (1.4%)   | 27 (9.6%)  | 245 (87.2%)        | 36      |
| The overall process was easy and worked well.                                                                                                        | 4 (1.4%)              | 0        | 5 (1.8%)   | 45 (16%)   | 227 (80.8%)        | 36      |
| Overall, I was satisfied with the HealthLink BC 8-1-1 Virtual Physician service.                                                                     | 5 (1.8%)              | 1 (0.4%) | 2 (0.7%)   | 28 (9.9%)  | 247 (87.3%)        | 34      |
|                                                                                                                                                      | 1 = More anxious      | 2        | 3          | 4          | 5 = Much better    | Missing |
| Compare how you felt before you spoke to the HealthLink BC 8-1-1 Virtual Physician to how you feel now that you have spoken to the Virtual Physician | 8 (2.7%)              | 9 (3.1%) | 39 (13.4%) | 71 (24.4%) | 164 (56.4%)        | 26      |
|                                                                                                                                                      | Yes                   | No       | Missing    |            |                    |         |
| Do you plan to take the action recommended by the HealthLink BC 8-1-1 Virtual Physician?                                                             | 283 (97.6%)           | 7 (2.4%) | 27         |            |                    |         |

1  
2  
3 **TITLE PAGE**  
4  
5  
6

7 Development and early evaluation of HealthLink Emergency iDoctors in-assistance (HEiDi): An  
8 integration of virtual physicians into a provincial 811 health information telephone line  
9

10  
11 Kendall Ho,<sup>1,2,3</sup> Helen Novak Lauscher,<sup>1,2</sup> Kurtis Stewart,<sup>1</sup> Eric Grafstein,<sup>2</sup> Riyad B. Abu-laban,<sup>2,3</sup> Frank  
12 Scheuermeyer,<sup>4,5</sup> Jim Christenson,<sup>2,3</sup> Sandra Sundhu<sup>6</sup>  
13  
14  
15

16 Affiliations:  
17

- 18 1. Digital Emergency Medicine, Department of Emergency Medicine, Faculty of Medicine, The University  
19 of British Columbia, 818 West 10th Avenue, Vancouver, BC, Canada V5Z 1M9  
20  
21 2. Department of Emergency Medicine, Faculty of Medicine, The University of British Columbia, 2775  
22 Laurel Street, Vancouver, BC, Canada V5Z 1M9  
23  
24 3. BC Emergency Medicine Network, 2775 Laurel Street, Vancouver, BC, Canada V5Z 1M9  
25  
26 4. Department of Emergency Medicine, St Paul's Hospital and The University of British Columbia, 1081  
27 Burrard St, Vancouver, BC, Canada V6Z 1Y6  
28  
29 5. Centre for Health Evaluation and Outcome Sciences, 588 – 1081 Burrard Street, St Paul's Hospital,  
30 Vancouver, BC, Canada V6Z 1Y6  
31  
32 6. HealthLink BC, Primary Care Division, Ministry of Health, PO Box 9638, STN PROV GOVT, Victoria, BC,  
33 Canada V8W 9P1  
34  
35  
36  
37

38 Corresponding Author: Dr. Kendall Ho, [kendall.ho@ubc.ca](mailto:kendall.ho@ubc.ca)  
39  
40

41 Declaration of Competing Interests: The authors have no competing interests to declare.  
42  
43  
44  
45  
46  
47  
48  
49  
50  
51  
52  
53  
54  
55  
56  
57  
58  
59  
60

## ABSTRACT

Background: British Columbia, like many jurisdictions, has a health information telephone service (811) to provide callers information by nurses and help them decide whether to attend an emergency department (ED), primary care clinic, or manage their concern at home. We developed and evaluated a novel service (HEiDi) that partnered virtual physicians (VP) with 811 nurses to support callers.

Methods: All callers categorized as “seek care within 24 hours” by nurses were eligible for referral to HEiDi. VPs connected directly with callers via desktop videoconferencing software, assessed their health complaint, provided advice, and suggested care disposition. We prospectively collected demographics, health concern, VP-determined disposition, caller feedback, and caller outcomes.

Results: From April 6 to August 2, 2020, HEiDi VPs provided 7687 consultations. Most callers (57.8%) were in the 20-64 age range and 62.9% were female. Common health concerns were related to gastroenterology (16.6%), respiratory (11.4%), and dermatology (11.4%). Of the 7531 calls with available data: 2548 (33.8%) were advised to attempt home treatment, 2885 (38.3%) to contact a primary care physician within one week, 1331 (15.0%) to attend an ED immediately, and 538 (7.1%) to attend their primary provider now. Three hundred seventeen callers responded to the post-call survey, showing a 97.2% satisfaction rate with their experience.

Interpretation: Virtual physicians can provide an effective complement to a provincial health telephone system that results in 72.1% of callers diverted from urgent in-person care assessment and accelerates 15.0% of callers to seek immediate ED care, while providing high satisfaction.

Keywords: Virtual care; Interprofessional collaboration; Healthcare utilization; Telemedicine; Public health

## INTRODUCTION

The novel coronavirus 2019 (COVID-19) pandemic exposed challenges throughout Canada for citizens to access health professionals and health system resources. Unfamiliarity with this disease and its severity prompted many to seek educational information on symptoms to determine whether or not an urgent need existed to access acute care facilities, such as Emergency Departments (ED) or Urgent and Primary Care Centres (UPCC). Visits to EDs during the pandemic decreased,<sup>1</sup> most likely due to fear of disease contraction and concern over appropriateness of ED visits, underscoring a need for patients to have alternative ways to seek care and access health information. In addition, the rules for testing and self-isolation were complex and often changing, thus the public was seeking a consistent source for specific, professional advice.

In 2008, British Columbia (BC) established a province-wide telephone service (811) as an alternative to in-person assessment. Other jurisdictions (e.g., Alberta,<sup>2</sup> United Kingdom's 111 service<sup>3</sup>) also have similar services where registered nurses (RN) provide advice to callers regarding their health concerns. The RNs can advise callers to call 911, go to an ED immediately, seek medical care within 24 hours, schedule an in-person appointment with their usual care provider, or continue with home-based management. In 2016, our team conducted a pilot project and found that incorporating emergency physicians to further assess and advise ED-directed callers led to a 15% decrease in ED visits compared with RN advice alone during the same time period one year previously.<sup>4</sup>

In March 2020, the COVID-19 pandemic led to an immediate seven-fold increase in calls to BC's 811 service, overwhelming personnel and telephone lines. In response and in part based on our pilot project experience, 811 rapidly initiated a novel virtual physician (VP) service – *HealthLink BC Emergency iDoctors in-assistance* (HEiDi) – to assist 811 RNs in providing support to callers and triaging. This paper describes the development and four-month early program evaluation of the HEiDi service.

## METHODS

### *Design*

This is a prospective cohort study of HEiDi, which commenced on April 6, 2020 to manage COVID-19-related calls and expanded to include all calls starting April 22. We used routinely collected, anonymized data from 811.

### *Setting and Sample*

BC is a province with over five million residents across five regional health authorities.<sup>5</sup> The 811 telephone service, managed by HealthLink BC (HLBC) in BC Ministry of Health, is available to any BC resident and manages approximately 450,000 calls annually. Callers can discuss their personal health issues, those of a family member, or other individual under their care. Trained RNs determine callers' dispositions using the *healthwise*<sup>®</sup> algorithm (Healthwise, Inc., Boise, USA) and their clinical judgement, triaging callers to one of the following categories: "red" to seek ED care immediately; "yellow" to seek care within 24 hours; "black" to seek primary care within seven days; or "green" to try home treatment.

### *The HEiDi Service*

In mid-March 2020, HLBC established the HEiDi service in partnership with the BC Emergency Medicine Network,<sup>6,7</sup> Rural Coordination Centre of BC,<sup>8</sup> and UBC Department of Emergency Medicine. HEiDi recruited 40 family and emergency physicians to work as VPs. Virtual medical office assistants (VMOA), situated on-site at 811 offices, received referrals from 811 RNs and transferred callers to connect with

1  
2  
3 VPs, who were located off-site throughout BC. VPs provided initially 12 hours of services per day from  
4 10:00-22:00, seven days per week, and rapidly increased to 36 hours of daily service per day within four  
5 weeks.  
6

7 As the VP coverage could not accommodate all callers that connected with RNs, HLBC and VP leadership  
8 jointly decided on the following callers' eligibility criteria for referral from 811 RNs to HEiDi: (1) basic  
9 English-language proficiency as there was no consistent translation services available to VPs; (2)  
10 currently residing in BC; and (3) triaged "yellow" by RN, as we felt this group of callers can potentially be  
11 given sufficient advice that may render ED or UPCC visits within 24 hours unnecessary.  
12  
13

14 The HEiDi VPs are either emergency physicians or full-service family physicians licensed in BC, as these  
15 physicians have domain expertise in the assessment of whether callers need to be treated in an ED  
16 versus being managed in the community. With callers' explicit consent, VMOAs securely sent callers'  
17 synopses of the chief complaints and related health information captured by 811 RNs to VPs via an  
18 electronic medical record system (MOIS, Bright Health, Prince George, BC). VPs initiated the consults  
19 with callers via Zoom phone calls (Zoom Video Communications, Inc., San Jose, USA); if the clinical  
20 situation was deemed by either the callers or the VP to warrant visual assessments, and with mutual  
21 agreement, a Zoom video call was initiated. VPs directly provided health advice to callers and retained  
22 or modified RN disposition decisions based on the same classification as above. To ensure safety, VPs  
23 could trigger follow-up calls by another VP the next day or later to check callers' health status, ensure  
24 improvement, or exclude deterioration. In addition, for quality assurance purposes, all new VPs during  
25 their first 3 clinical shifts had all callers contacted by the follow-up VP the next-day.  
26  
27  
28

### 29 **Data Sources**

30 Four different data sources were utilized: (1) 811's telephony system, which recorded the volume of  
31 calls received each day by service level; (2) 811's caller encounter electronic health record, a database  
32 with detailed record of each caller, including demographics, health problem category, nurse triage  
33 decision, and, specific to HEiDi, the VP triage decision and clinical notes; (3) from mid-May onwards,  
34 MOIS data extracts which contained information related to VP consultation characteristics (e.g.,  
35 duration); and (4) as of June 8, 2020, an anonymous online caller survey, offered to all HEiDi callers via a  
36 URL (<https://survey.health.gov.bc.ca/hlbcVPS#>). This 18-item survey included questions asked callers to  
37 rate aspects of the service, their experience, and planned actions on a five-point Likert-type scale, along  
38 with several demographic and open-ended questions. The survey was co-developed by members of the  
39 811 service leadership and staff (including members of clinical, operational, communications, and  
40 analytics teams, plus the university clinical and evaluation leads). The survey was intended to provide an  
41 accessible and practical means of capturing patient feedback for quality improvement purposes. Items  
42 were developed based on service goals and others adapted from previously published surveys related to  
43 patient perspectives on virtual health encounters.<sup>9,10</sup>  
44  
45  
46  
47

### 48 **Outcomes**

49 This process evaluation focused on both program and caller outcomes relevant to HEiDi, including: call  
50 volumes, particularly the busiest days, characteristics of callers accessing HEiDi (e.g., age group, gender,  
51 health concern, if concern is COVID-19 related, health authority), characteristics of the virtual  
52 consultations (e.g., duration), the proportion of callers diverted from seeking care within 24 hours (as  
53 defined by the percentage of callers triaged "yellow" by VPs compared to 811 RNs), caller-reported  
54  
55  
56  
57  
58  
59  
60

1  
2  
3 experience and satisfaction with HEiDi. We additionally standardized calls by each geographic health  
4 authority's population to compare the number of calls per 100,000 residents.<sup>11</sup>  
5

### 6 **Analysis**

7 R (version 4.0.2, R Core Team, Vienna, Austria) was used for the analysis, with results descriptively  
8 expressed as means (standard deviations, SD) if normally distributed, or medians (interquartile ranges,  
9 IQR) if non-normally distributed. X<sup>2</sup>-tests were used to compare distributions between categorical  
10 variables and *t*-tests to compare normally distributed variables (no comparisons of non-normally  
11 distributed variables were done).  
12  
13

### 14 **Ethics Statement**

15 As this evaluation was for quality assurance and improvement purposes and used routinely collected  
16 anonymized data, no ethical approval was sought, in keeping with the Tri-Council Policy Statement<sup>125</sup>  
17 and guidance provided by the University of British Columbia's Research Ethics Board.  
18  
19

## 20 **RESULTS**

### 21 **Call Volumes**

22 During the 17-week study period, 811 RNs triaged 21,441 callers as "yellow," of whom 7,845 (36.6%)  
23 were referred to HEiDi and 7,687 (98.0%) of those received a virtual consultation. Figure 1 shows the  
24 flow of callers through 811 and HEiDi. Figure 2 shows the daily and cumulative call volumes of HEiDi for  
25 the reporting period. The single day peak was 106 calls on July 12, while HEiDi managed a mean of 74.84  
26 (SD=12.62) calls per day since the service expanded to 36 hours of coverage. On average, Saturday and  
27 Sunday were the busiest days of the week, while Monday and Tuesday were the slowest (see  
28 Supplementary Material); weekends (mean=73.32 calls per day [SD=21.91]) were busier than weekdays  
29 (mean=62.42 calls per day [SD=20.21]; *p*=0.015).  
30  
31  
32

### 33 **Caller Characteristics**

34 Table 1 summarizes demographic characteristics of callers. Callers were more likely to be female and  
35 57.8% were adults in the 20-64 years old age range. Health concerns encompassed a range of 23  
36 standard problem categories used by 811 RNs (see Supplementary Material), with approximately half  
37 being one of four categories and 39.3% being COVID-19-related. The distribution of age groups  
38 significantly differed by gender (*p*<0.001), with female callers more likely to be in the 20-39 year old age  
39 group (38.2% v. 26.2%) and males were more likely to be in the 0-4 year old age groups (23.4% v. 12.5%)  
40 (see Supplementary Material).  
41  
42

43 While 35.9% of absolute calls came from one regional health authority (Fraser), calls standardized by  
44 population revealed that the number of calls per 100,000 residents was: 180.37 for Vancouver Island;  
45 152.99 for Northern; 141.66 for Interior; 140.96 for Fraser; and 138.03 for Vancouver Coastal (Figure 3).  
46 The distribution of age groups significantly differed by health authority (*p*<0.001), but gender was  
47 similar across health authorities (*p*=0.42) (see Supplementary Material).  
48  
49

50 Based on 5659 consultations with available data in MOIS since its mid-May implementation, 5538  
51 unique callers accessed HEiDi, with 112 callers having multiple consultations (excluding follow-ups)  
52 within the reporting period. Of those, 107 (95.5%) had two consultations and five (4.5%) had three or  
53 more.  
54  
55  
56  
57  
58  
59  
60



### ***VP Consultation Characteristics***

After speaking with the 811 RN, most callers (88.9%) waited one minute or less before their call was answered by the HEiDi VMOA (median=0.05 minutes [IQR=0.03–0.32]). After speaking with the VMOA, callers waited a median time of 28 minutes (IQR=19–44) before the VP contacted them to begin the consultation. Consultations with VPs lasted a median time of 18 minutes (IQR=13–24). Based on 5659 consultations with available MOIS data, 996 (17.6%) consultations used Zoom video. VPs completed a mean of 12.29 (SD=3.79) consultations per six-hour shift.

### ***VP Triage Decision***

Of the 7687 callers assessed by a VP, 7531 (98.0%) had available data for the VP's triage decision. Of those, 2548 (33.8%) were advised to attempt home treatment and 2885 (38.3%) were advised to contact a primary care physician within one week, resulting in a "downgrade" of triage level for 72.1% of callers (Figure 1). A further 1331 (15.0%) were advised to attend an ED or UPCC immediately and 538 (7.1%) were advised to attend their primary care provider now. The distribution of VP triage decisions significantly differed by health authority ( $p=0.004$ ), with Northern having the lowest "green" triage proportion and Interior having the highest "red" triage proportion (see Supplementary Material).

### ***Caller-Reported Experience***

Responses were received from 331 callers (an 18.2% response rate of 1819 survey links sent), of which 317 (95.8%) were at least partially completed. Callers who responded to the survey almost uniformly rated their experience with the HEiDi service very favorably (97.2% satisfied with overall experience), 80.8% reported that they felt better after speaking with the VP, and 97.6% stated that they planned to follow the physician's advice (Figure 4, and see Supplementary Material).

## **INTERPRETATION**

Telephone-based 811 services offered by public health systems that respond to citizens' urgent health inquiries exist in BC, many provinces in Canada, and globally.<sup>2,3</sup> While callers accessing these services use phones and are connected with nurses, HEiDi is the first such service (that we are aware of) to integrate virtual physicians in partnership with nurses to provide advice to callers, using video in appropriate cases. Two studies from other jurisdictions during the COVID-19 pandemic reported that telemedicine options that replace in-person appointments were rated favourably by callers.<sup>13,14</sup>

Our early process evaluation results indicate that, by partnering VPs with 811 RNs, a substantial percentage of callers can be diverted from urgent referrals to in-person EDs or UPCC visits, compared to RN-triage alone. During the peak of the COVID-19 pandemic, this undoubtedly helped preserve ED and UPCC capacity to treat those who need acute care services, decreased congestion and overcrowding of EDs or walk-in-clinics, and improved appropriate use of acute care services. Moreover, a virtual approach protected individuals from unnecessary potential exposure to COVID-19 and other infections in ED or UPCC waiting rooms.

Appropriate triaging of 811 callers also led to an acceleration of those callers who required acute care to present to ED immediately, while simultaneously reassuring those that could be managed at home or by their community-based healthcare services. In this respect, the HEiDi service was designed to preserve the primary care system to serve callers' needs longitudinally by health professionals familiar to them. This is the only report that we are aware of that describes the experience by physicians to define who can be served virtually and who needs a face-to-face visit for assessment and/or treatment.

1  
2  
3 While the response rate to survey was relatively low, callers felt that HEiDi VPs provided timely and  
4 trustworthy information and assurance. A majority of HEiDi callers were able to manage at home or  
5 without needing to go to the ED. Those callers who did respond to the survey reported high satisfaction  
6 and reassurance for both callers and their families. They reported reduction in anxiety in dealing with  
7 their conditions or problems for which they called 811. Further, this on-demand phone and  
8 videoconferencing service was easily accessible and convenient for all BC residents, available seven days  
9 per week anywhere in the province, including remote communities.  
10  
11

12 From the health system's perspective, this preliminary process evaluation suggested that HEiDi is a  
13 consistent, reliable, and provincially accessible approach for timely access of health advice to all callers.  
14 The VP workforce can contract or expand based on caller volumes, providing staffing flexibility for  
15 pandemic-related volume increases and decreases. HEiDi supported the appropriate triaging of callers  
16 through interprofessional collaboration with 811 RNs and VMOAs, such that only calls requiring  
17 physician intervention were answered by HEiDi. Conceivably, this could result in cost-effectiveness by  
18 deploying physicians only when deemed necessary.  
19  
20

### 21 **Limitations**

22 This is a preliminary report of a novel physician-assisted nurse-managed telephone service in a single  
23 province during a pandemic, thus results may differ in other settings or times. Callers outside of BC, or  
24 those who did not speak English, were not served by this program and results may be different. We have  
25 not yet collected long-term or linked administrative data, therefore callers may have attended the ED,  
26 been hospitalized, or died as a result of their condition, irrespective of physician advice, without our  
27 knowledge. Many primary care physicians were unavailable, or only available by telephone, and this  
28 increased our ED and UPCC referral rates, compared to time periods when more comprehensive primary  
29 care was available. The caller survey findings and low response rate likely reflect both selection and  
30 social desirability biases and these may spuriously increase favorable results. At this stage, we cannot  
31 estimate the direct and indirect costs and benefits of the program beyond the outlined results.  
32  
33  
34

### 35 **Conclusion**

36 Our early program evaluation of HEiDi during its first 17 weeks of service demonstrates that VPs can add  
37 significant and flexible capacity to an 811 service. It results in a substantial proportion of callers diverted  
38 from seeking immediate in-person medical attention, has accelerated urgent care when appropriate,  
39 and has been well received by callers. Our innovative use of information technology enabling virtual  
40 physician consultations supports citizens' equitable access to needed healthcare advice and information  
41 and merits consideration in other similar public telephone access systems, during and beyond  
42 pandemics. In future research, we intend to link our 811 data with ED and practitioner data to assess  
43 patient safety, system utilization, and cost-effectiveness.  
44  
45  
46  
47  
48  
49  
50  
51  
52  
53  
54  
55  
56  
57  
58  
59  
60

**DATA SHARING STATEMENT**

Data reported here are available from the corresponding author upon reasonable request with requisite permissions.

**CONTRIBUTOR'S STATEMENT**

All authors meet the four ICMJE's criteria for authorship, namely all authors: (1) contributed substantially to conception and design, or acquisition of data, or analysis and interpretation of data, (2) drafted the article or revised it critically for important intellectual content, (3) gave final approval of the version to be published, and (4) agreed to act as guarantor of the work (ensuring that questions related to any part of the work are appropriately investigated and resolved).

**FUNDING STATEMENT**

The HEiDi service is funded by the British Columbia Ministry of Health through HealthLink BC. This evaluation was funded by British Columbia's Joint Standing Committee on Rural Issues. The funder had no role in the design of this evaluation, data collection, analysis, interpretation, drafting the manuscript, or decision to submit for publication.

Confidential

**REFERENCES**

1. CIHI. Canadian emergency department visits drop 25% in early weeks of COVID-19 pandemic [Internet]. 2020 [cited 2020 Sep 1]. Available from: <https://www.cihi.ca/en/canadian-emergency-department-visits-drop-25-in-early-weeks-of-covid-19-pandemic>
2. Alberta Health Services. Health Link 811 [Internet]. 2020 [cited 2020 Sep 1]. Available from: <https://www.albertahealthservices.ca/findhealth/service.aspx?Id=1001957&facilityId=1011654>
3. NHS. NHS 111 [Internet]. 2020 [cited 2020 Sep 1]. Available from: <https://www.nhs.uk/using-the-nhs/nhs-services/urgent-and-emergency-care/nhs-111/>
4. Grafstein E, Abu-Laban RB, Wong B, Stenstrom R, Scheuermeyer FX, Root M, et al. Safety and efficiency of emergency physician supplementation in a provincially nurse-staffed telephone service for urgent caller advice. *CJEM* [Internet]. 2017 May 15;19(S1):S32–3. Available from: [https://www.cambridge.org/core/product/identifier/S1481803517000781/type/journal\\_article](https://www.cambridge.org/core/product/identifier/S1481803517000781/type/journal_article)
5. Panel on Research Ethics. Tri-Council Policy Statement: Ethical Conduct for Research Involving Humans – TCPS 2 (2018) [Internet]. 2020 [cited 2020 Sep 1]. Available from: [https://ethics.gc.ca/eng/policy-politique\\_tcps2-eptc2\\_2018.html](https://ethics.gc.ca/eng/policy-politique_tcps2-eptc2_2018.html)
6. BC Stats. Quarterly Population Highlights [Internet]. 2020. Available from: [https://www2.gov.bc.ca/assets/gov/data/statistics/people-population-community/population/population\\_highlights\\_2020q1.pdf](https://www2.gov.bc.ca/assets/gov/data/statistics/people-population-community/population/population_highlights_2020q1.pdf)
7. Abu-Laban RB, Drebit S, Lindstrom RR, Archibald C, Eggers K, Ho K, et al. The British Columbia Emergency Medicine Network: A Paradigm Shift in a Provincial System of Emergency Care. *Cureus* [Internet]. 2018 Jan 4; Available from: <https://www.cureus.com/articles/9922-the-british-columbia-emergency-medicine-network-a-paradigm-shift-in-a-provincial-system-of-emergency-care>
8. Marsden J, Drebit S, Lindstrom R, MacKinnon C, Archibald C, Abu-laban. The BC Emergency Medicine Network: Evaluation Approach And Early Findings. *BCMJ*. 2019;61(4):164–71.
9. RCCbc. Rural Coordination Centre of BC [Internet]. 2020 [cited 2020 Sep 1]. Available from: <https://rccbc.ca/>
10. BC Stats. British Columbia - Population Estimates [Internet]. 2020 [cited 2020 Sep 1]. Available from: <https://bcstats.shinyapps.io/popApp/>
11. Fieux M, Duret S, Bawazeer N, Denoix L, Zaouche S, Tringali S. Telemedicine for ENT: Effect on quality of care during Covid-19 pandemic. *Eur Ann Otorhinolaryngol Head Neck Dis* [Internet]. 2020 Sep;137(4):257–61. Available from: <https://linkinghub.elsevier.com/retrieve/pii/S1879729620301538>
12. Dobrusin A, Hawa F, Gladshiteyn M, Corsello P, Harlen K, Walsh CX, et al. Gastroenterologists and Patients Report High Satisfaction Rates With Telehealth Services During the Novel Coronavirus 2019 Pandemic. *Clin Gastroenterol Hepatol* [Internet]. 2020 Jul; Available from: <https://linkinghub.elsevier.com/retrieve/pii/S1542356520309769>

FIGURES

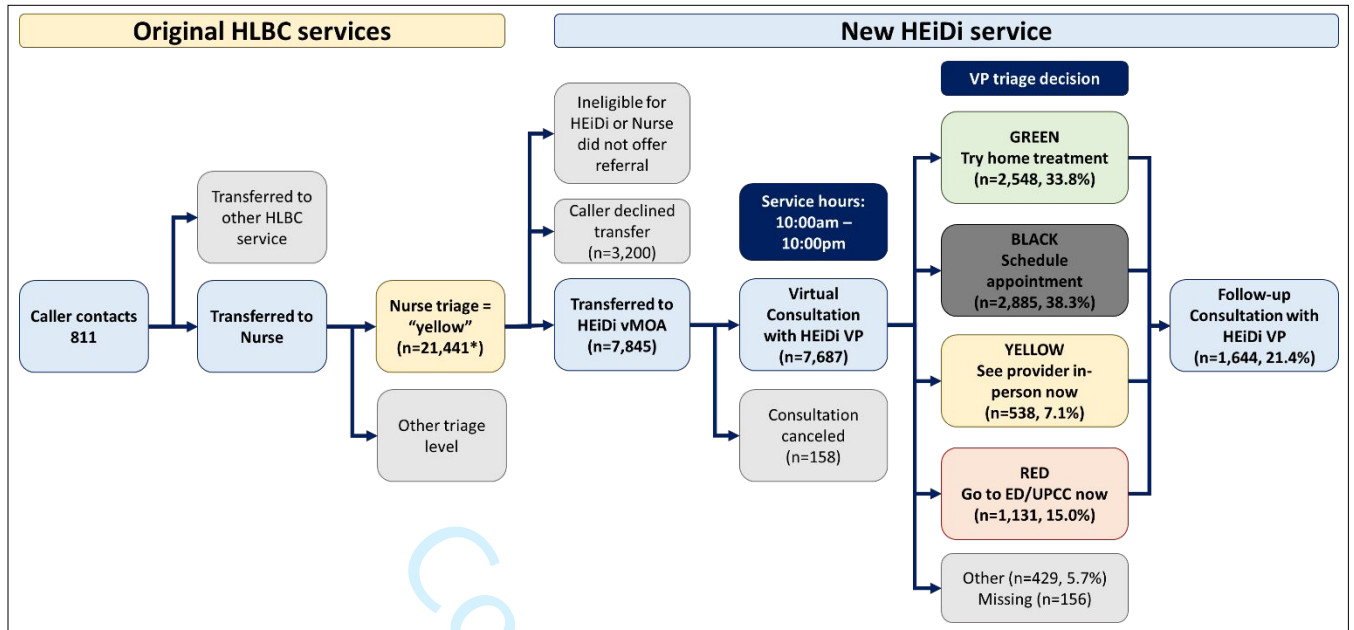

Figure 1. Flow of callers through 811 and HEiDi service. \*Nurse call numbers reported here are only for the 12-hour period of the HEiDi service.

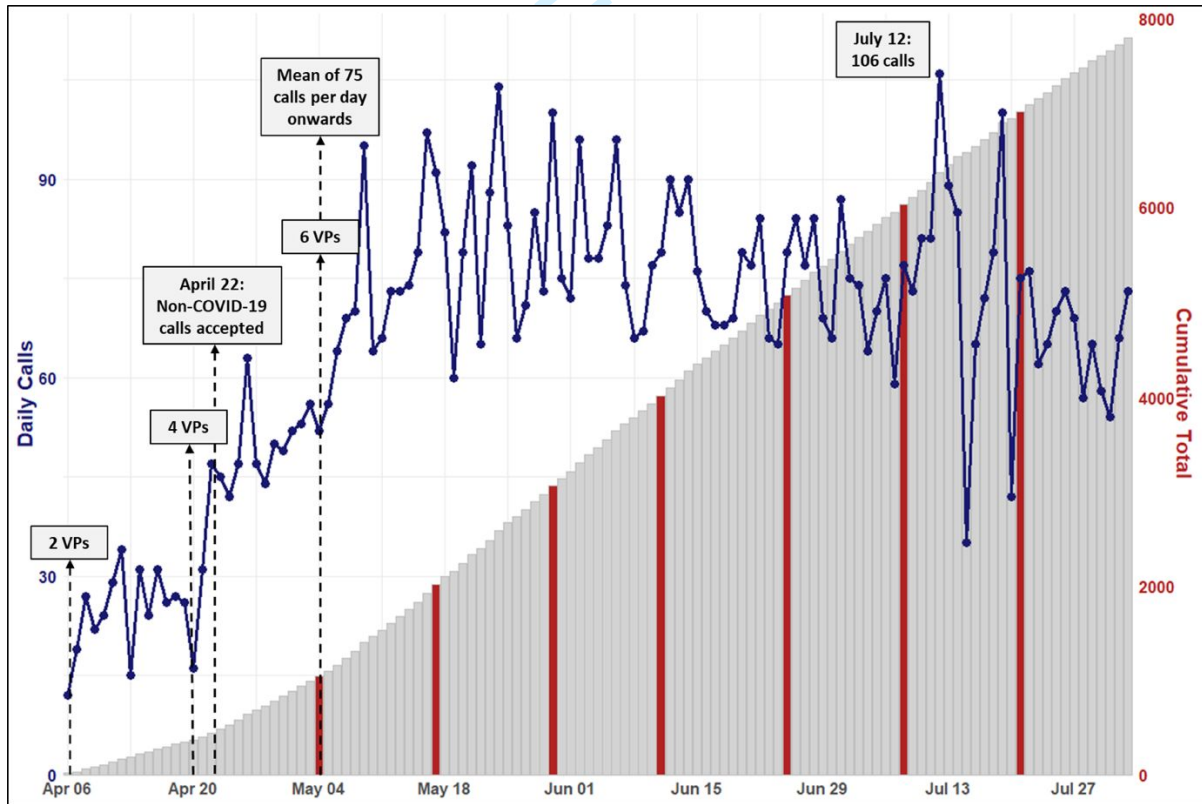

Figure 2. Daily and cumulative call volumes to HEiDi. Red bars indicate when 1,000, 2,000, etc. calls were received.

1  
2  
3  
4  
5  
6  
7  
8  
9  
10  
11  
12  
13  
14  
15  
16  
17  
18  
19  
20  
21  
22  
23  
24  
25  
26  
27  
28  
29  
30  
31  
32  
33  
34  
35  
36  
37  
38  
39  
40  
41  
42  
43  
44  
45  
46  
47  
48  
49  
50  
51  
52  
53  
54  
55  
56  
57  
58  
59  
60

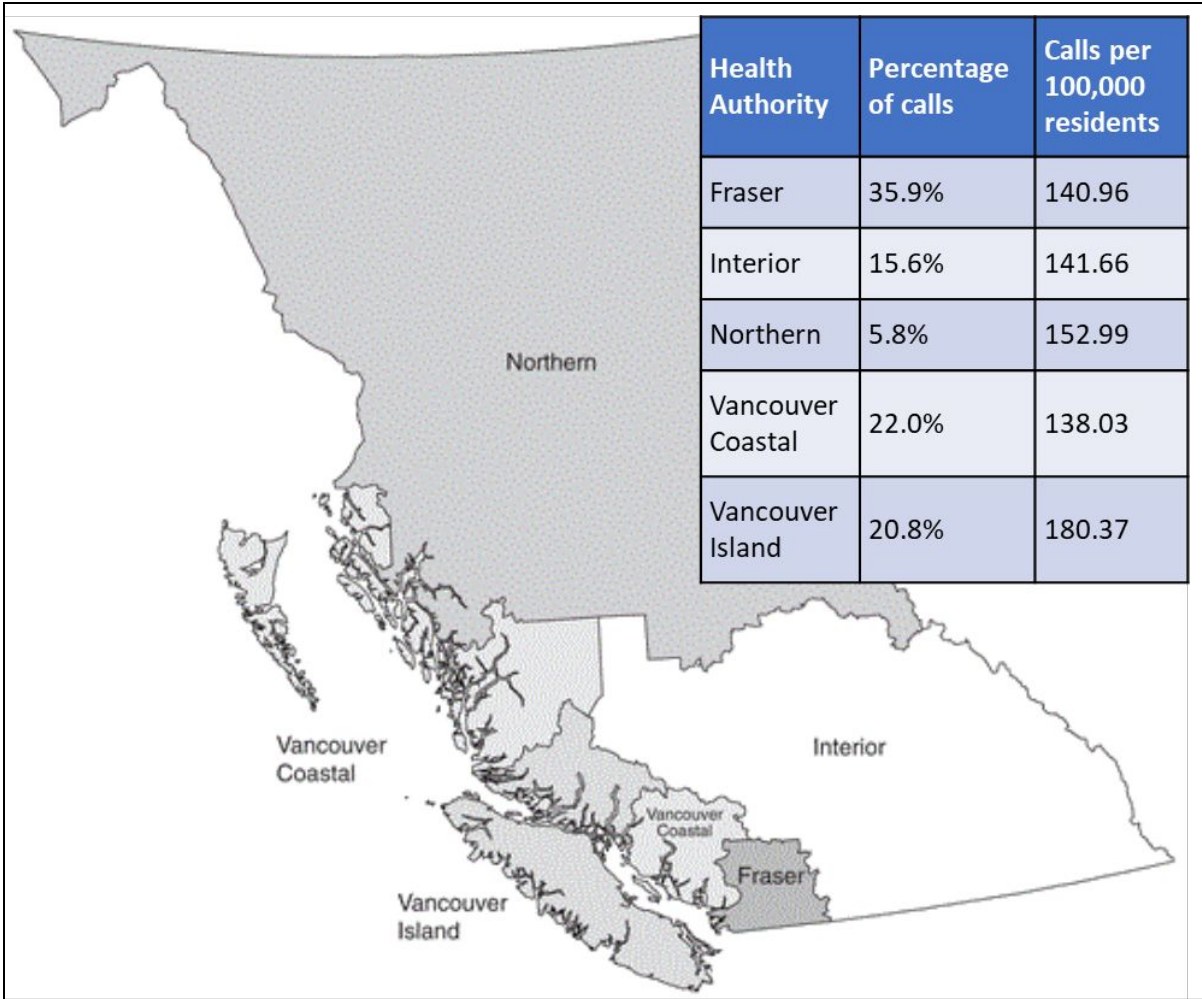

**Figure 3. Summary of percentage of calls and population-standardized number of calls by BC Health Authority.**

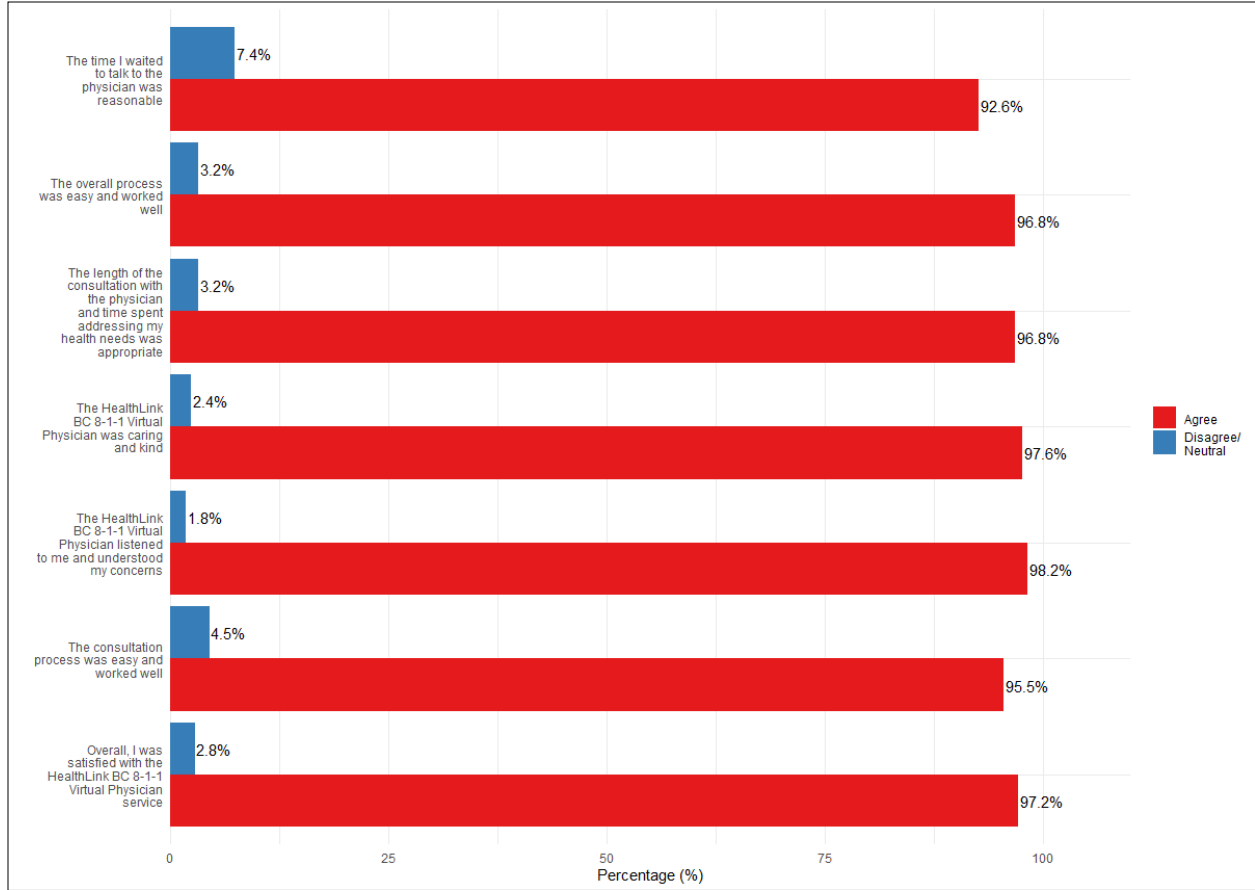

**Figure 4. Caller-reported satisfaction ratings from the post-call online survey (n=317).** Ratings were dichotomized into “Agree” (caller rating = 4 or 5) and “Disagree/Neutral” (caller rating = 1, 2, or 3). The items presented here correspond to the first seven items in Table 2.



## TABLES

| <b>Table 1. Caller characteristics of HEiDi referrals (n=7687).</b>                                                                                                                                                                                                                                                                                                                                                                                                                          |                           |
|----------------------------------------------------------------------------------------------------------------------------------------------------------------------------------------------------------------------------------------------------------------------------------------------------------------------------------------------------------------------------------------------------------------------------------------------------------------------------------------------|---------------------------|
| <b>Gender (female)</b>                                                                                                                                                                                                                                                                                                                                                                                                                                                                       | 4814 (62.9%)              |
| <i>Missing or Unknown</i>                                                                                                                                                                                                                                                                                                                                                                                                                                                                    | 37                        |
| <b>Age group</b>                                                                                                                                                                                                                                                                                                                                                                                                                                                                             |                           |
| < 1 year                                                                                                                                                                                                                                                                                                                                                                                                                                                                                     | 544 (7.0%)                |
| 1 – 4 years                                                                                                                                                                                                                                                                                                                                                                                                                                                                                  | 721 (9.4%)                |
| 5 – 19 years                                                                                                                                                                                                                                                                                                                                                                                                                                                                                 | 887 (11.6%)               |
| 20 – 39 years                                                                                                                                                                                                                                                                                                                                                                                                                                                                                | 2603 (33.9%)              |
| 40 – 64 years                                                                                                                                                                                                                                                                                                                                                                                                                                                                                | 1836 (23.9%)              |
| > 64 years                                                                                                                                                                                                                                                                                                                                                                                                                                                                                   | 1090 (14.2%)              |
| <i>Missing or Unknown</i>                                                                                                                                                                                                                                                                                                                                                                                                                                                                    | 2                         |
| <b>Health Authority</b>                                                                                                                                                                                                                                                                                                                                                                                                                                                                      |                           |
| <i>Fraser</i>                                                                                                                                                                                                                                                                                                                                                                                                                                                                                | 2688 (35.9%)              |
| <i>Interior</i>                                                                                                                                                                                                                                                                                                                                                                                                                                                                              | 1172 (15.6%)              |
| <i>Northern</i>                                                                                                                                                                                                                                                                                                                                                                                                                                                                              | 435 (5.8%)                |
| <i>Vancouver Coastal</i>                                                                                                                                                                                                                                                                                                                                                                                                                                                                     | 1648 (22.0%)              |
| <i>Vancouver Island</i>                                                                                                                                                                                                                                                                                                                                                                                                                                                                      | 1549 (20.7%)              |
| <i>Missing or Unknown</i>                                                                                                                                                                                                                                                                                                                                                                                                                                                                    | 195                       |
| <b>Health concern category</b>                                                                                                                                                                                                                                                                                                                                                                                                                                                               |                           |
| <i>Gastroenterology (digestive)</i>                                                                                                                                                                                                                                                                                                                                                                                                                                                          | 1275 (16.6%)              |
| <i>Respiratory</i>                                                                                                                                                                                                                                                                                                                                                                                                                                                                           | 877 (11.4%)               |
| <i>Dermatology (skin, hair, nails)</i>                                                                                                                                                                                                                                                                                                                                                                                                                                                       | 874 (11.4%)               |
| <i>Musculoskeletal (bone, muscle, joint)</i>                                                                                                                                                                                                                                                                                                                                                                                                                                                 | 813 (10.5%)               |
| <b>Caller's health concern related to COVID-19</b>                                                                                                                                                                                                                                                                                                                                                                                                                                           | 1169 (39.3%) <sup>1</sup> |
| <i>Missing or Unknown</i>                                                                                                                                                                                                                                                                                                                                                                                                                                                                    | 4749                      |
| <b>Caller has a usual care provider</b>                                                                                                                                                                                                                                                                                                                                                                                                                                                      | 1228 (81.3%) <sup>2</sup> |
| <i>Missing</i>                                                                                                                                                                                                                                                                                                                                                                                                                                                                               | 133                       |
| <i>No follow-up</i>                                                                                                                                                                                                                                                                                                                                                                                                                                                                          | 6043                      |
| <p><i>Note: cell values represent counts (percentages). Percentages were calculated after removing missing/unknown/not applicable data from the denominator.</i></p> <p><sup>1</sup><i>Only a subset of 2977 HEiDi calls were recorded if they were COVID-19-related or not.</i></p> <p><sup>2</sup><i>Only callers receiving a subsequent follow-up call from a VP are asked if they have a usual care provider; 1511 callers received a follow-up call and answered this question.</i></p> |                           |

## SUPPLEMENTARY MATERIAL

### *Call volumes by day of week*

| <b>Summary of HEiDi call volumes by day.</b> |                                                    |
|----------------------------------------------|----------------------------------------------------|
| <b>Day of week</b>                           | <b>Mean (SD) number of daily calls (n=17 each)</b> |
| Mon                                          | 59.71 (25.14)                                      |
| Tue                                          | 60.06 (19.71)                                      |
| Wed                                          | 62.53 (19.1)                                       |
| Thu                                          | 64.94 (18.84)                                      |
| Fri                                          | 64.88 (19.39)                                      |
| Sat                                          | 72.53 (22.5)                                       |
| Sun                                          | 74.12 (21.97)                                      |

### *811 health problem categories*

Total n=7687; 23 problem categories used.

| <b>Nursing problem category</b>          | <b>n</b> | <b>%</b> |
|------------------------------------------|----------|----------|
| Gastroenterology (Digestive)             | 1275     | 16.6     |
| Respiratory                              | 877      | 11.4     |
| Dermatology (Skin, Hair, Nails)          | 874      | 11.4     |
| Musculoskeletal (Bone, Muscle, Joint)    | 811      | 10.6     |
| Otolaryngology (Ear, Nose, Throat)       | 602      | 7.8      |
| Neurology                                | 597      | 7.8      |
| First Aid                                | 414      | 5.4      |
| Gynecology (Women's Reproductive)        | 407      | 5.3      |
| Urology (Urinary Tract & Male Genitalia) | 335      | 4.4      |
| Ophthalmology (Eyes)                     | 308      | 4.0      |
| Pediatrics                               | 275      | 3.6      |
| Obstetrics & Postpartum                  | 230      | 3.0      |
| Immunology                               | 181      | 2.4      |
| Cardiovascular (Heart/Circulation)       | 171      | 2.2      |
| Dental/Mouth                             | 123      | 1.6      |
| Psychology (Mental Health)               | 73       | 0.9      |
| Diabetes                                 | 42       | 0.5      |

|                                  |    |     |
|----------------------------------|----|-----|
| Wellness                         | 23 | 0.3 |
| Pharmaceutical (Medication)      | 22 | 0.3 |
| Endocrinology (Glands)           | 21 | 0.3 |
| Infectious/Communicable Diseases | 19 | 0.2 |
| Oncology (Site-Specific Cancers) | 5  | 0.1 |
| Hematology (Blood)               | 2  | 0.0 |

### **Distributions of age group, gender, and health authority**

Total n=7687.

| Age Group               | Female (n=4814) | Male (n=2836) | Gender missing (n=37) |
|-------------------------|-----------------|---------------|-----------------------|
| < 1 year                | 269 (5.6%)      | 277 (9.8%)    | 2                     |
| 1 – 4 years             | 331 (6.9%)      | 386 (13.6%)   | 4                     |
| 5 – 19 years            | 526 (10.9%)     | 354 (12.5%)   | 7                     |
| 20 – 39 years           | 1841 (38.2%)    | 743 (26.2%)   | 19                    |
| 40 – 64 years           | 1168 (24.3%)    | 666 (23.5%)   | 2                     |
| > 64 years              | 679 (14.1%)     | 410 (14.5%)   | 1                     |
| Age group missing (n=2) | 0               | 0             | 2                     |

| Health Authority                 | Female (n=4701) | Male (n=2777) | Gender missing (n=37) |
|----------------------------------|-----------------|---------------|-----------------------|
| Fraser                           | 1673 (35.6%)    | 1010 (36.4%)  | 5                     |
| Interior                         | 717 (15.3%)     | 455 (16.4%)   | 0                     |
| Northern                         | 281 (6%)        | 152 (5.5%)    | 2                     |
| Vancouver Coastal                | 1036 (22%)      | 609 (21.9%)   | 3                     |
| Vancouver Island                 | 994 (21.1%)     | 551 (19.8%)   | 4                     |
| Health authority missing (n=195) | 113             | 59            | 23                    |

| Age Group               | Fraser (n=2688) | Interior (n=1172) | Northern (n=435) | Vancouver Coastal (n=1648) | Vancouver Island (n=1549) | Health authority missing (n=195) |
|-------------------------|-----------------|-------------------|------------------|----------------------------|---------------------------|----------------------------------|
| < 1 year                | 247 (9.2%)      | 81 (6.9%)         | 26 (6%)          | 126 (7.6%)                 | 58 (3.7%)                 | 10                               |
| 1 – 4 years             | 296 (11%)       | 99 (8.4%)         | 47 (10.8%)       | 156 (9.5%)                 | 104 (6.7%)                | 19                               |
| 5 – 19 years            | 332 (12.4%)     | 130 (11.1%)       | 66 (15.2%)       | 170 (10.3%)                | 171 (11%)                 | 17                               |
| 20 – 39 years           | 849 (31.6%)     | 388 (33.1%)       | 159 (36.6%)      | 620 (37.6%)                | 508 (32.8%)               | 79                               |
| 40 – 64 years           | 607 (22.6%)     | 263 (22.4%)       | 115 (26.4%)      | 377 (22.9%)                | 422 (27.2%)               | 52                               |
| > 64 years              | 357 (13.3%)     | 211 (18%)         | 22 (5.1%)        | 199 (12.1%)                | 286 (18.5%)               | 15                               |
| Age group missing (n=3) | 0               | 0                 | 0                | 0                          | 0                         | 3                                |

### Distribution of VP triage decision by health authority

Note: These numbers exclude the category of “other” for VP triage decision. The distribution of VP triage decisions significantly differed by health authority ( $\chi^2(12)=28.95, p=0.004$ ).

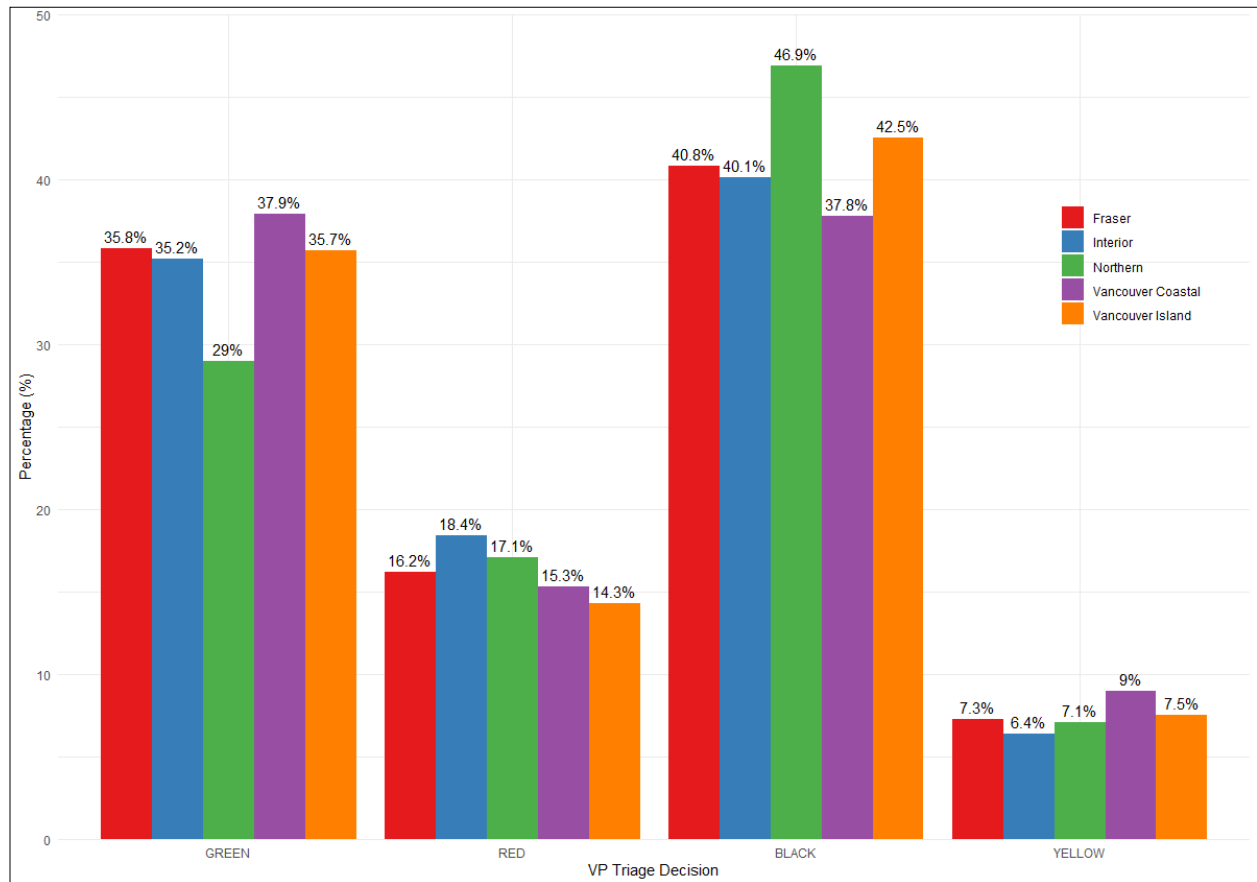

| Health Authority         | VP Triage Decision |             |              |            |
|--------------------------|--------------------|-------------|--------------|------------|
|                          | Green              | Red         | Black        | Yellow     |
| <b>Fraser</b>            | 893 (35.8%)        | 403 (16.2%) | 1016 (40.8%) | 181 (7.3%) |
| <b>Interior</b>          | 385 (35.2%)        | 201 (18.4%) | 439 (40.1%)  | 70 (6.4%)  |
| <b>Northern</b>          | 115 (29%)          | 68 (17.1%)  | 186 (46.9%)  | 28 (7.1%)  |
| <b>Vancouver Coastal</b> | 578 (37.9%)        | 233 (15.3%) | 576 (37.8%)  | 137 (9%)   |
| <b>Vancouver Island</b>  | 506 (35.7%)        | 203 (14.3%) | 602 (42.5%)  | 107 (7.5%) |

*Green: caller advised to try treatment at home.*

*Red: caller advised to go to ED immediately.*

*Black: caller advised to schedule an in-person appointment with their primary care provider within the next 7 days.*

*Yellow: caller advised to see primary care provider within 24 hours.*

1  
2  
3  
4  
5  
6  
7  
8  
9  
10  
11  
12  
13  
14  
15  
16  
17  
18  
19  
20  
21  
22  
23  
24  
25  
26  
27  
28  
29  
30  
31  
32  
33  
34  
35  
36  
37  
38  
39  
40  
41  
42  
43  
44  
45  
46  
47  
48  
49  
50  
51  
52  
53  
54  
55  
56  
57  
58  
59  
60

**Summary of caller responses to online survey**

| Summary of caller responses to online post-consultation survey (n=317).                                                                              |                       |          |            |            |                    |         |
|------------------------------------------------------------------------------------------------------------------------------------------------------|-----------------------|----------|------------|------------|--------------------|---------|
| Question                                                                                                                                             | Response options      |          |            |            |                    | Missing |
|                                                                                                                                                      | 1 = Strongly disagree | 2        | 3          | 4          | 5 = Strongly agree |         |
| The consultation process was easy and worked well.                                                                                                   | 6 (2.1%)              | 0        | 7 (2.4%)   | 42 (14.6%) | 232 (80.8%)        | 30      |
| The HealthLink BC 8-1-1 Virtual Physician was caring and kind.                                                                                       | 4 (1.4%)              | 1 (0.3%) | 2 (0.7%)   | 17 (5.9%)  | 262 (91.6%)        | 31      |
| The HealthLink BC 8-1-1 Virtual Physician listened to me and understood my concerns.                                                                 | 4 (1.4%)              | 0        | 1 (0.4%)   | 21 (7.4%)  | 259 (90.9%)        | 32      |
| The time I waited to talk to the physician was reasonable.                                                                                           | 2 (0.7%)              | 5 (1.8%) | 14 (5%)    | 46 (16.3%) | 215 (76.2%)        | 35      |
| The length of the consultation with the physician and time spent addressing my health needs was appropriate.                                         | 3 (1.1%)              | 2 (0.7%) | 4 (1.4%)   | 27 (9.6%)  | 245 (87.2%)        | 36      |
| The overall process was easy and worked well.                                                                                                        | 4 (1.4%)              | 0        | 5 (1.8%)   | 45 (16%)   | 227 (80.8%)        | 36      |
| Overall, I was satisfied with the HealthLink BC 8-1-1 Virtual Physician service.                                                                     | 5 (1.8%)              | 1 (0.4%) | 2 (0.7%)   | 28 (9.9%)  | 247 (87.3%)        | 34      |
|                                                                                                                                                      | 1 = More anxious      | 2        | 3          | 4          | 5 = Much better    | Missing |
| Compare how you felt before you spoke to the HealthLink BC 8-1-1 Virtual Physician to how you feel now that you have spoken to the Virtual Physician | 8 (2.7%)              | 9 (3.1%) | 39 (13.4%) | 71 (24.4%) | 164 (56.4%)        | 26      |
|                                                                                                                                                      | Yes                   | No       | Missing    |            |                    |         |
| Do you plan to take the action recommended by the HealthLink BC 8-1-1 Virtual Physician?                                                             | 283 (97.6%)           | 7 (2.4%) | 27         |            |                    |         |
